# Sex Differences in Global mRNA Content of Human Skeletal Muscle

Amy C. Maher<sup>1</sup>, Minghua H. Fu<sup>2</sup>, Robert J. Isfort<sup>4</sup>, Alex R. Varbanov<sup>4</sup>, Xiaoyan A. Qu<sup>4</sup>, Mark A. Tarnopolsky<sup>3\*</sup>

**1** Department of Medical Sciences, McMaster University, Hamilton, Ontario, Canada, **2** Department of Kinesiology, McMaster University, Hamilton, Ontario, Canada, **3** Department of Pediatrics and Medicine, McMaster University, Hamilton, Ontario, Canada, **4** Procter and Gamble Pharmaceuticals, Mason, Ohio, United States of America

## Abstract

Women oxidize more fat as compared to men during endurance exercise and several groups have shown that the mRNA content of selected genes related to fat oxidation are higher in women (e.g. hormone sensitive lipase,  $\beta$ -hydroxyacyl-CoA dehydrogenase, CD36). One of the possible mechanisms is that women tend to have a higher area percentage of type I skeletal muscle fibers as compared with men. Consequently, we hypothesized that sex would influence the basal mRNA and protein content for genes involved in metabolism and the determination of muscle fiber type. Muscle biopsies from the *vastus lateralis* were collected from healthy men and women. We examined mRNA content globally using Affymetrix GeneChips, and selected genes were examined and/or confirmed by RT-PCR. Furthermore, we examined protein content by Western blot analysis. Stringent gene array analysis revealed 66 differentially expressed genes representing metabolism, mitochondrial function, transport, protein biosynthesis, cell proliferation, signal transduction pathways, transcription and translation. Stringent gene array analysis and RT-PCR confirmed that mRNA for; acyl-coenzyme A acyltransferase 2 (ACAA2), trifunctional protein  $\beta$  (HADHB), catalase, lipoprotein lipase (LPL), and uncoupling protein-2 (UCP-2) were higher in women. Targeted gene analysis revealed that myosin heavy chain I (MHCI), peroxisome proliferator-activated receptor (PPAR) $\delta$  were higher in women compared with men. Surprisingly, there were no significant sex based differences in protein content for HADHB, ACAA2, catalase, PPAR $\delta$ , and MHCI. In conclusion, the differences in the basal mRNA content in resting skeletal muscle suggest that men and women are transcriptionally “primed” for known physiological differences in metabolism however the mechanism behind sex differences in fiber type remains to be determined.

**Citation:** Maher AC, Fu MH, Isfort RJ, Varbanov AR, Qu XA, et al. (2009) Sex Differences in Global mRNA Content of Human Skeletal Muscle. PLoS ONE 4(7): e6335. doi:10.1371/journal.pone.0006335

**Editor:** Geraldine Butler, University College Dublin, Ireland

**Received:** January 23, 2009; **Accepted:** June 22, 2009; **Published:** July 22, 2009

**Copyright:** © 2009 Maher et al. This is an open-access article distributed under the terms of the Creative Commons Attribution License, which permits unrestricted use, distribution, and reproduction in any medium, provided the original author and source are credited.

**Funding:** Dr. Tarnopolsky is partially supported by an endowed chair from Michael DeGroot and Hamilton Health Sciences Foundation. Some of the equipment used in the analysis was purchased from a donation from Warren Lammert and Kathy Corkins. This study was supported by an NSERC grant to MA Tarnopolsky. AC Maher was supported by an NSERC fellowship. The funders had no role in study design, data collection and analysis, decision to publish, or preparation of the manuscript.

**Competing Interests:** The authors have declared that no competing interests exist.

\* E-mail: tarnopol@mcmaster.ca

## Introduction

Skeletal muscle is the most abundant tissue in the human body [1], and there are major differences between women and men in energy metabolism, fiber type composition, and contractile speed [2,3,4]; however, the mechanisms behind these differences are unknown. A number of groups have reported differences in exercise related substrate metabolism between men and women, specifically that women oxidize more lipid and less carbohydrate than men [5,6,7,8,9,10,11]. Similar studies in rats have also found gender differences in lipid metabolism, specifically that female rats have greater lipid oxidation and muscle lipoprotein lipase (LPL) activity, as compared with male rats [12,13]. Furthermore, when female rats are oophorectomized, lipid oxidation is lower during endurance exercise [14]. The exact mechanisms behind such observations are unclear; however, sex differences in mRNA content and protein expression appear to be directionally consistent with the observed metabolic differences present during exercise. Specifically, women compared to age and fitness matched men have higher mRNA content for LPL [15], membrane fatty acid transport protein 1 (FATm) [16], FAT/CD36 transporter and

plasma membrane fatty acid binding protein (FABPpm) [15], citrate synthase [17],  $\beta$ -hydroxyacyl-CoA dehydrogenase ( $\beta$ -HAD) [17], and hormone sensitive lipase [11]. On the whole body level, women show greater lipolysis [5,18], and greater uptake of plasma free fatty acids [18], and use more intramuscular triacylglycerol [11,19,20] than men.

Furthermore, a sex difference in muscle fiber composition has been found in different skeletal muscles, such as, *erector spinae* [21], *internal and external intercostal*, *latissimus dorsi* [22], *biceps brachii* [23], *vastus medialis* [24], and *vastus lateralis* [5,25,26,27,28,29,30]. Although studies concerning sex differences in skeletal muscle fiber type have shown inconsistent results [4,25,26,28,29,31,32], women generally have a greater relative type I fiber area [4,5,26,27,30], a smaller relative area of type II fibers and a greater percentage area of type I fibers [4,5,26,27,28,32]. The potential molecular mechanisms behind these sex differences have not been evaluated for the mRNA species of the genes involved in muscle development, or fiber-type determination and differentiation.

The molecular mechanisms for the observed differences in substrate oxidation and fiber type between men and women are

unknown. In this study we used a targeted approach (RT-PCR) to evaluate mRNA species of the genes involved in muscle development, fiber-type determination and differentiation, and a microarray comparison to evaluate the many more potential mRNA species that are required for lipid metabolism and fiber type in human skeletal muscle, which may yield important data for understanding potential novel mechanisms. Gene array technology has provided a rapid and efficient way to screen a large number of mRNAs in order to identify potential targets and pathways for further research. Recently, several groups have used gene arrays to identify novel transcriptional programs related to human muscle repair, inflammation, protein synthesis and cellular control in skeletal muscle after various interventions such as exercise [33,34,35], immobilization [36], and drug treatments [37]. A few groups have done targeted gene expression profiles to examine sex differences in humans [38,39] and mice [40]. In this study, skeletal muscle biopsies from healthy, young men and women were analyzed for mRNA abundance of over 23,000 genes by Affymetrix gene array analysis with an *a priori* hypothesis that mRNA species involved in lipid oxidation, muscle development, and fiber-type determination and differentiation would be different in women compared with men. Furthermore, we hypothesized that this global analysis would identify novel mRNA targets that are relevant to biological pathways that differ in skeletal muscle between men and women.

## Materials and Methods

### Participants

These studies were approved by the Human Research Ethics Board of McMaster University. The present study used muscle samples from two different studies that recruited subjects using identical criteria and subject characteristics were not significantly different (Table 1). All subjects were between the ages of 18 and 35, healthy, recreationally active, and non-smokers. Highly trained athletes were excluded from the studies. All female participants were eumenorrheic. The present study only compared muscle samples collected at baseline (before manipulation) thus termed “resting muscle” from the two studies. In *study 1*, 14 women and 13 men volunteered to participate but we only used samples from 12 women

and 12 men. Subject characteristics have been previously published [30] but can be viewed in Table 1. In *study 2*, 24 healthy, recreationally active men (n = 11) and women (n = 13) participated [41]. Data from these subjects regarding diet, CHO, protein and fat oxidation has been previously reported [41], and demonstrated that women had higher fat oxidation and lower protein and carbohydrate oxidation during endurance exercise as compared with men. The muscle samples collected pre-exercise were used for the present study and only samples from women in the follicular phase of their menstrual cycle were used as there was little difference in mRNA content of metabolic related genes between follicular and luteal phase women (Figure S1) compared to differences due to sex (Figure S2) (unpublished data). *Study 1* samples were used to acquire the gene array data, histochemical data is a combination of a representative subset of subjects from both studies, and RNA and protein data was acquired from *study 2* samples. A comparison of subject characteristics is reported in Table 1. All study participants gave written consent to participate in the study.

### Acquisition of muscle samples

Muscle samples were obtained from the *vastus lateralis* muscle, ~15 cm proximal to the lateral knee joint line, using a custom suction-modified Bergstrom needle. Biopsies were taken at rest and all subjects refrained from any exercise for at least 3 days before the muscle biopsy. All biopsies were completed in the morning. Approximately 60 mg of muscle tissue was divided and snap-frozen in liquid nitrogen and stored in a  $-80^{\circ}\text{C}$  freezer for RNA and protein analysis.

### Histochemical analysis

Histochemical analyses were conducted on samples from *study 1 and 2*, as described by Yasuda *et al.* [30]. Briefly, the OCT mounted muscle samples were serially sectioned to 10  $\mu\text{m}$  thickness, and slides were preincubated at a pH value of 4.60 in 50 mM potassium acetate, 17.5 mM calcium chloride for 7 min. Slides were rinsed with distilled, deionized water (ddH<sub>2</sub>O) between each of the following steps. Slides were incubated in 3 mM ATP using an alkaline solution (75 mM glycine, 40.5 mM calcium chloride, 75 mM NaCl, 67.5 mM NaOH, pH 9.4) for 45 min at 37°C with agitation at regular intervals. They were incubated consecutively in

**Table 1.** Subject characteristics from study #1 and study #2.

|                                                                        | Study #1                   |                  | Study #2           |                 |
|------------------------------------------------------------------------|----------------------------|------------------|--------------------|-----------------|
|                                                                        | Men (n = 12)               | Women (n = 12)   | Men (n = 11)       | Women (n = 13)  |
| Age (yr)                                                               | 21 ± 1                     | 22 ± 1           | 21 ± 1             | 22 ± 2          |
| Weight (kg)                                                            | 79 ± 4                     | 61 ± 2*          | 80 ± 3             | 63 ± 2*         |
| Height (cm)                                                            | 179 ± 2                    | 164 ± 1*         | 178 ± 1            | 165 ± 1*        |
| BF (%)                                                                 | 18 ± 1                     | 25 ± 1*          | 19 ± 5             | 29 ± 5*         |
| FFM (kg)                                                               | 64 ± 3                     | 44 ± 1*          | 59 ± 1             | 52 ± 1*         |
| BMI                                                                    | 25 ± 1                     | 23 ± 1           | 25 ± 1             | 23 ± 1          |
| VO <sub>2</sub> peak (ml*kg body wt <sup>-1</sup> *min <sup>-1</sup> ) | NA                         | NA               | 45 ± 1             | 39 ± 2*         |
| (ml*kg FFM <sup>-1</sup> *min <sup>-1</sup> )                          | NA                         | NA               | 56 ± 1             | 54 ± 3          |
| Menstrual cycle                                                        |                            | 7 = Fol, 5 = Lut |                    | Fol             |
| Oral Contraceptive use                                                 |                            | 6 = OC, 6 = NOC  |                    | 6 = OC, 7 = NOC |
| Feeding state                                                          | Boost® 2 hrs before biopsy |                  | Fasted (10–12 hrs) |                 |

\*significant difference between men and women for each study (P<0.05). There is no significant difference between the men or the women in study 1 compared with study 2. BF; body fat, BMI; body mass index, Fol; follicular phase, Lut; luteal phase, OC; oral contraceptives.

doi:10.1371/journal.pone.0006335.t001

**Table 2. Primer Sequences.**

| Gene Name                                           | Forward Primer         | Reverse Primer           |
|-----------------------------------------------------|------------------------|--------------------------|
| beta2-microglobulin                                 | ggctatccagcgctactcaa   | gatgaaaccagacacatagca    |
| Catalase                                            | actgaggccaccctgactac   | tcgcattcttaggtctca       |
| Lipoprotein Lipase (LPL)                            | gaaaggcacctgcggatt     | catgccgttctttgtctgta     |
| Uncoupling protein-2 (UCP-2)                        | tcatacctttctctggatac   | agaatgggtcccatcacac      |
| Acyl-coenzyme A acyltransferase-2 (ACAT2)           | ggcaggagaagcaagatga    | gcaccattgaaggaacctatg    |
| Aldehyde dehydrogenase 1 family member A1 (ALDH1A1) | cgccagactactctctact    | ctcctcagttgcaggattaag    |
| Trifunctional protein $\beta$ subunit (HADHB)       | aaacaagcaatgtggctagaga | ggcttggttgccagagatac     |
| Myosin Heavy Chain I (MHC I)                        | cctggaacatctggagacct   | agctgcttcggacctct        |
| Myosin Heavy Chain IIa (MHCIIa)                     | caatctagctaaatccgcaagc | tcacttatgctttgtgtgtaacct |
| Myosin Heavy Chain IIx (MHCIIx)                     | aatgggtggaagaagagagctc | aatacagcttcatcaggggc     |
| PGC-1alpha                                          | ttgctaaacgactccgagaa   | tgcaaaagttccctctctgct    |
| PPARdelta                                           | actgagttgcccaagagcat   | gtgcagccatacttgagaa      |
| Myostatin                                           | gaccctgcgagactcctaca   | aataccagtgctgggttca      |

\*All primer sequences are shown 5' to 3', left to right.  
doi:10.1371/journal.pone.0006335.t002

1% CaCl<sub>2</sub> and 2% CoCl<sub>2</sub> for 3 min, and then incubated in 1% ammonium sulphide for 30 s at room temperature. Sections were photographed at 200 $\times$  magnifications with a microscope (Olympus America Inc., Melville, NY) in conjunction with a SPOT digital camera (Model: SP401-115, SPOT Diagnostic Instruments Inc., MI). Based on the staining intensity at pH 4.60, the three fiber types were classified as Type I (dark), IIa (light) and IIx (intermediate). Cross-sectional areas of the muscle fibers ( $\mu\text{m}^2$ ) were determined using an image analysis program (Image Pro, V6.0, Media Cybernetics Inc., Silver Spring, MD).

### Microarray Preparation

Muscle samples from *study 1* were used to extract RNA, and the RNA was prepared according to Affymetrix recommendations (Santa Clara, CA). In brief, muscle samples were homogenized in TRIzol Reagent (Life Technologies, Rockville, MD) by shaking in a mixer mill with tungsten carbide beads as recommended by the manufacturer (Qiagen, Life Technologies, Rockville, MD). RNA was purified using an RNeasy Mini Kit (Qiagen, Chatsworth, CA). Ten micrograms of purified RNA was reverse transcribed using SuperScript II Reverse Transcriptase and T7-(dT)<sub>24</sub> primer followed by second strand DNA synthesis as per the manufacturer's instructions (Life Technologies, Rockville, MD). Contaminants were removed from the samples by phenol-chloroform-isoamyl alcohol extraction, and the clean cDNA was recovered by ethanol precipitation, using a RNA Transcript Labeling Kit (Enzo Diagnostics, Farmingdale, NY), it was further converted into biotin-labeled cRNA, as per manufacturer's instructions. Moreover, cRNA was purified using a RNeasy Mini Kit (Qiagen, Life Technologies, Rockville, MD) and fragmented in pieces <200 bases by incubation in fragmentation buffer. Samples were stored at  $-20^\circ\text{C}$  until hybridization.

Samples were hybridized on human HG-U133 Plus 2.0 Arrays using protocols as recommended by Affymetrix (Affymetrix, Santa Clara, CA). In brief, 24 gene chips were used to compare 12 women to 12 men. Biotinylated cRNA was hybridized for 16 h at  $45^\circ\text{C}$  in a GeneChip Hybridization Oven 640. Arrays were placed in a GeneChip Fluidic Station 400 for a series of washes, followed by incubation with streptavidin-conjugated phycoerythrin. Finally, arrays were scanned with a GeneArray Scanner (Agilent, Palo

Alta, CA) and analyzed using GeneChip Analysis software (Affymetrix, Santa Clara, CA).

### Statistical Analysis of MicroArray

The statistical analysis was based on the Affymetrix signal (MAS 5.0 algorithm). Exploratory statistical tools were used to check data quality. There were no quality control problems with the data. The data was then filtered based on the given algorithms for gene content levels, which filtered out genes that have low content levels compared to background (Affymetrix Absent Calls). When a minimum of 19 out of 24 gene replicates read as Affymetrix Absent Calls, the gene is filtered out. An ANOVA model with log (base 2) of the Affymetrix signal as a response is fitted for each one of the genes that are not filtered based on Affymetrix Absent Calls. Significant differential content is calculated by the NLOGP ( $-\log_{10}(\text{P-value})$ ). A gene was considered to be differentially expressed if the NLOGP measure was greater than the 4, and the fold change was at least 1.2. Table S1. Proctor and Gamble use these criteria for their Affymetrix gene array analyses [42]. The negative log of the  $p$  value (NLOGP) was calculated from ( $-\log_{10}(\text{NLOGP } 4 = p \text{ value threshold of } 0.0001)$ ), where the  $p$  value is a summary measure of the statistical significance for the corresponding comparison.

### Gene annotation and functional analysis

Gene function and characterization information was obtained from the Affymetrix website: <http://www.affymetrix.com/analysis/index.affx>. Further description was obtained from various databases at the National Center for Biotechnology Information. iPath<sup>TM</sup> (Invitrogen) was used to compare differentially regulated genes against 225 signaling and metabolic human biological pathway maps created for Invitrogen<sup>TM</sup> by GeneGo. (<http://escience.invitrogen.com/ipath>). Differentially regulated gene were also run against a Connectivity Map, which is a gene expression database with statistical scoring algorithm to link drug treatment, genes, and diseases.

All gene array data can be accessed via Gene Expression Omnibus (GEO) <http://www.ncbi.nlm.nih.gov/geo/>. Accession #GSE14901. The data used for this study were the PRECAST values (Table S1) only from a larger study "Limb immobilization induces a coordinate down-regulation of mitochondrial and other metabolic pathways in men and women".

**Table 3.** Differential expression of mRNA in women vs men.

| Gene Name                                                                                                                            | Symbol       | Fold Change | NLOGP | Biological Process                                                                                                         |
|--------------------------------------------------------------------------------------------------------------------------------------|--------------|-------------|-------|----------------------------------------------------------------------------------------------------------------------------|
| <b>Metabolism</b>                                                                                                                    |              |             |       |                                                                                                                            |
| hydroxyacyl-Coenzyme A dehydrogenase/3-ketoacyl-Coenzyme A thiolase/enoyl-Coenzyme A hydratase (trifunctional protein), beta subunit | HADHB        | 1.32        | 4.00  | lipid metabolism, fatty acid metabolism, fatty acid beta-oxidation                                                         |
| acetyl-Coenzyme A acyltransferase 2 (mitochondrial 3-oxoacyl-Coenzyme A thiolase)                                                    | ACAA2        | 1.61        | 5.20  | lipid metabolism, fatty acid metabolism, cholesterol biosynthesis                                                          |
| lipoprotein lipase                                                                                                                   | LPL          | 1.85        | 4.30  | fatty acid metabolism, circulation, lipid catabolism                                                                       |
| aldehyde dehydrogenase 2 family (mitochondrial)                                                                                      | ALDH2        | 1.46        | 4.70  | carbohydrate metabolism, alcohol metabolism                                                                                |
| argininosuccinate synthetase 1                                                                                                       | ASS1         | 2.19        | 6.60  | urea cycle, arginine biosynthesis, amino acid biosynthesis                                                                 |
| aldehyde dehydrogenase 1 family, member A1                                                                                           | ALDH1A1      | -1.88       | 6.00  | aldehyde metabolism                                                                                                        |
| <b>Mitochondrial function/oxidative stress</b>                                                                                       |              |             |       |                                                                                                                            |
| catalase                                                                                                                             | CAT          | 1.7         | 6.60  | electron transport, response to oxidative stress, hydrogen peroxide catabolism                                             |
| uncoupling protein 2 (mitochondrial, proton carrier)                                                                                 | UCP2         | 1.5         | 4.20  | proton transport in the mitochondria                                                                                       |
| ATP synthase mitochondrial F1 complex assembly factor 1                                                                              | ATPAF1       | -1.49       | 4.00  | protein complex assembly                                                                                                   |
| <b>Transport</b>                                                                                                                     |              |             |       |                                                                                                                            |
| solute carrier family 25, member 34                                                                                                  | SLC25A34     | 2.37        | 4.20  | transport (mitochondrial carrier)                                                                                          |
| solute carrier family 1 (glutamate/neutral amino acid transporter), member 4                                                         | SLC1A4       | -2.2        | 4.80  | dicarboxylic acid transport, neutral amino acid transport                                                                  |
| <b>Signal transduction</b>                                                                                                           |              |             |       |                                                                                                                            |
| Rap guanine nucleotide exchange factor (GEF) 2                                                                                       | RAPGEF2      | 1.21        | 4.00  | intracellular signal transduction, MAPK cascade, cAMP-mediated signaling ,                                                 |
| transducin-like enhancer of split 1 (E(sp1) homolog, Drosophila)                                                                     | TLE1         | 1.7         | 4.00  | regulation of transcription, signal transduction, frizzled signaling pathway                                               |
| kalirin, RhoGEF kinase                                                                                                               | KALRN        | 1.31        | 4.00  | protein amino acid phosphorylation, signal transduction, vesicle-mediated transport                                        |
| amyloid beta (A4) precursor-like protein 2                                                                                           | APLP2        | 1.32        | 5.60  | G-protein coupled receptor protein signaling pathway                                                                       |
| growth factor receptor-bound protein 10                                                                                              | GRB10        | 2.41        | 7.80  | intracellular signaling cascade , cell-cell signaling , insulin receptor signaling pathway                                 |
| Cyclin-dependent kinase inhibitor 1C (p57, Kip2)                                                                                     | CDKN1C       | 1.71        | 5.20  | regulation of cyclin-dependent protein kinase activity , G1 phase of mitotic cell cycle                                    |
| family with sequence similarity 13, member A1                                                                                        | FAM13A1      | 1.32        | 4.20  | signal transduction                                                                                                        |
| mitogen-activated protein kinase 6                                                                                                   | MAPK6        | -1.34       | 4.00  | protein amino acid phosphorylation , cell cycle , signal transduction                                                      |
| WW domain containing E3 ubiquitin protein ligase 1                                                                                   | WWP1         | -1.52       | 7.40  | signal transduction, negative regulation of transcription , protein ubiquitination, protein modification , ubiquitin cycle |
| Rho guanine nucleotide exchange factor (GEF) 10-like                                                                                 | ARHGEF10L    | -1.31       | 4.10  | regulation of Rho protein signal transduction                                                                              |
| <b>Transcription</b>                                                                                                                 |              |             |       |                                                                                                                            |
| Sine oculis homeobox homolog 1 (Drosophila)                                                                                          | SIX1         | 1.34        | 4.00  | regulation of transcription, muscle development                                                                            |
| small nuclear ribonucleoprotein polypeptide N, SNRPN upstream reading frame                                                          | SNRPN, SNURF | -1.6        | 5.90  | mRNA metabolism                                                                                                            |
| nuclear receptor interacting protein 1                                                                                               | NRIP1        | -1.59       | 4.60  | negative and positive regulation of transcription from RNA polymerase II promoter , androgen receptor signaling pathway    |
| TBC1 (tre-2/USP6, BUB2, cdc16) domain family, member 1                                                                               | TBC1D1       | -1.45       | 4.40  | DNA metabolism , chromosome organization and biogenesis                                                                    |
| cyclin H                                                                                                                             | CCNH         | -1.21       | 4.80  | regulation of cyclin-dependent protein kinase activity , DNA repair , regulation of transcription                          |
| LAG1 longevity assurance homolog 6 (S. cerevisiae)                                                                                   | LASS6        | -1.82       | 4.10  | regulation of transcription, lipid biosynthesis                                                                            |
| iroquois homeobox protein 3                                                                                                          | IRX3         | -10.92      | 11.40 | regulation of transcription                                                                                                |
| zinc finger protein 33A                                                                                                              | ZNF33A       | -1.57       | 4.00  | regulation of transcription                                                                                                |
| <b>Protein Biosynthesis and Translation</b>                                                                                          |              |             |       |                                                                                                                            |
| eukaryotic translation initiation factor 1A, X-linked                                                                                | EIF1AX       | 1.38        | 7.30  | protein biosynthesis, translational initiation                                                                             |
| eukaryotic translation initiation factor 2, subunit 3 gamma, 52 kDa                                                                  | EIF2S3       | 1.45        | 7.20  | protein biosynthesis                                                                                                       |

**Table 3. cont.**

| Gene Name                                                                            | Symbol            | Fold Change | NLOGP | Biological Process                                                   |
|--------------------------------------------------------------------------------------|-------------------|-------------|-------|----------------------------------------------------------------------|
| FK506 binding protein 9, 63 kDa                                                      | FKBP9             | 1.32        | 4.00  | protein folding                                                      |
| similar to Caspase-4 precursor (CASP-4) (ICH-2 protease) (TX protease) (ICE(rel)-II) | LOC648470         | 1.9         | 4.50  | proteolysis                                                          |
| JTV1 gene                                                                            | JTV1              | -1.42       | 5.80  | protein biosynthesis                                                 |
| ubiquitin specific peptidase 31                                                      | USP31             | -1.42       | 4.10  | ubiquitin-dependent protein catabolism                               |
| ring finger and CHY zinc finger domain containing 1                                  | RCHY1             | -1.31       | 5.10  | ubiquitin cycle                                                      |
| ADP-ribosylhydrolase like 1                                                          | ADPRHL1           | -1.61       | 4.70  | protein amino acid ADP-ribosylation                                  |
| <b>Cell Proliferation</b>                                                            |                   |             |       |                                                                      |
| zinc finger protein 36, C3H type-like 2                                              | ZFP36L2           | 1.48        | 4.80  | cell proliferation                                                   |
| monocyte to macrophage differentiation-associated                                    | MMD               | 1.67        | 4.10  | cytolysis                                                            |
| angiopoietin 1                                                                       | ANGPT1            | 1.74        | 4.30  | angiogenesis, signal transduction, cell differentiation, development |
| plexin C1                                                                            | PLXNC1            | 1.94        | 4.70  | cell adhesion, development                                           |
| cell division cycle associated 7-like                                                | CDCA7L, RAM2      | 2.45        | 4.40  | positive regulation of cell proliferation                            |
| tumor protein D52                                                                    | TPD52             | -1.72       | 5.70  | morphogenesis, B cell differentiation, secretion                     |
| Down syndrome critical region gene 1-like 1                                          | DSCR1L1           | -1.67       | 5.90  | central nervous system development, calcium-mediated signaling       |
| cytokine induced apoptosis inhibitor 1                                               | CIAPIN1           | -1.31       | 4.90  | apoptosis, anti-apoptosis                                            |
| CD24 molecule                                                                        | CD24              | -4.19       | 7.00  | humoral immune response                                              |
| dishevelled associated activator of morphogenesis 2                                  | DAAM2             | -1.71       | 4.20  | actin cytoskeleton organization and biogenesis                       |
| attractin-like 1                                                                     | ATRNL1            | -1.83       | 4.80  | development                                                          |
| spectrin, beta, non-erythrocytic 1                                                   | SPTBN1            | -1.52       | 5.30  | barbed-end actin filament capping                                    |
| <b>UNKNOWN</b>                                                                       |                   |             |       |                                                                      |
| ubiquitously transcribed tetratricopeptide repeat, X chromosome                      | UTX               | 2.13        | 9.35  | ---                                                                  |
| zinc finger, BED-type containing 5                                                   | ZBED5             | -1.31       | 4.30  | ---                                                                  |
| Nedd4 family interacting protein 2                                                   | NDFIP2            | -1.4        | 4.60  | ---                                                                  |
| chromosome 2 open reading frame 25                                                   | C2orf25           | -1.23       | 4.00  | ---                                                                  |
| tryptophan rich basic protein                                                        | WRB               | -1.47       | 6.00  | ---                                                                  |
| PQ loop repeat containing 3                                                          | PQLC3             | 1.77        | 4.30  | ---                                                                  |
| CDNA FLJ25488 fis, clone CBR00232                                                    | ---               | -1.34       | 5.20  | ---                                                                  |
| family with sequence similarity 79, member B                                         | FAM79B            | 5.94        | 8.80  | ---                                                                  |
| X (inactive)-specific transcript                                                     | XIST              | 192.07      | 32.77 | ---                                                                  |
| CDNA FLJ33569 fis, clone BRAMY2010317                                                | ---               | -1.47       | 4.00  | ---                                                                  |
| hypothetical protein                                                                 | LOC387882         | 3.04        | 5.30  | ---                                                                  |
| chromosome 8 open reading frame 22                                                   | C8orf22           | 2           | 4.20  | ---                                                                  |
| chromosome Y open reading frame 15A                                                  | CYorf15A          | -2.01       | 5.10  | ---                                                                  |
| KIAA1155 protein                                                                     | KIAA1155          | 1.71        | 5.10  | ---                                                                  |
| Prader-Willi syndrome chromosome region 1                                            | PWCR1             | -1.61       | 5.00  | ---                                                                  |
| Heparan-alpha-glucosaminide N-acetyltransferase, similar to transmembrane protein 76 | HGSNAT, LOC643642 | 1.53        | 5.30  | ---                                                                  |
| hypothetical gene CG018                                                              | CG018             | 1.61        | 6.60  | ---                                                                  |

\*Microarray significance >1.2 fold increase or decrease. NLOGP, negative log of the *p* value, >4.0. N = 12 men and 12 women. doi:10.1371/journal.pone.0006335.t003

### RNA isolation for RT-PCR

Muscle biopsy samples from *study 2* were used to isolated RNA as described previously[43]. Briefly, frozen muscle was thawed in a Tenbroeck homogenizer with 1 ml of TRIzol reagent (Invitrogen, Carlsbad, CA) and homogenized on ice. The homogenate was extracted with 200  $\mu$ l of chloroform. The aqueous phase was removed and the RNA was precipitated at room temperature using 500  $\mu$ l of iso-propanol and washed twice with 75% ethanol.

The final RNA pellet was air dried at room temperature and resuspended in 14  $\mu$ l ddH<sub>2</sub>O and treated with DNaseI. The RNA samples were quantified by spectrophotometer ( $A_{260}/A_{280} \geq 1.5$ ) and the quality was assessed by agarose gel electrophoresis.

### TaqMan® Real-time RT-PCR

TaqMan® real-time RT-PCR was conducted on total RNA. Duplex RT-PCR was performed using an iCycler real-time PCR



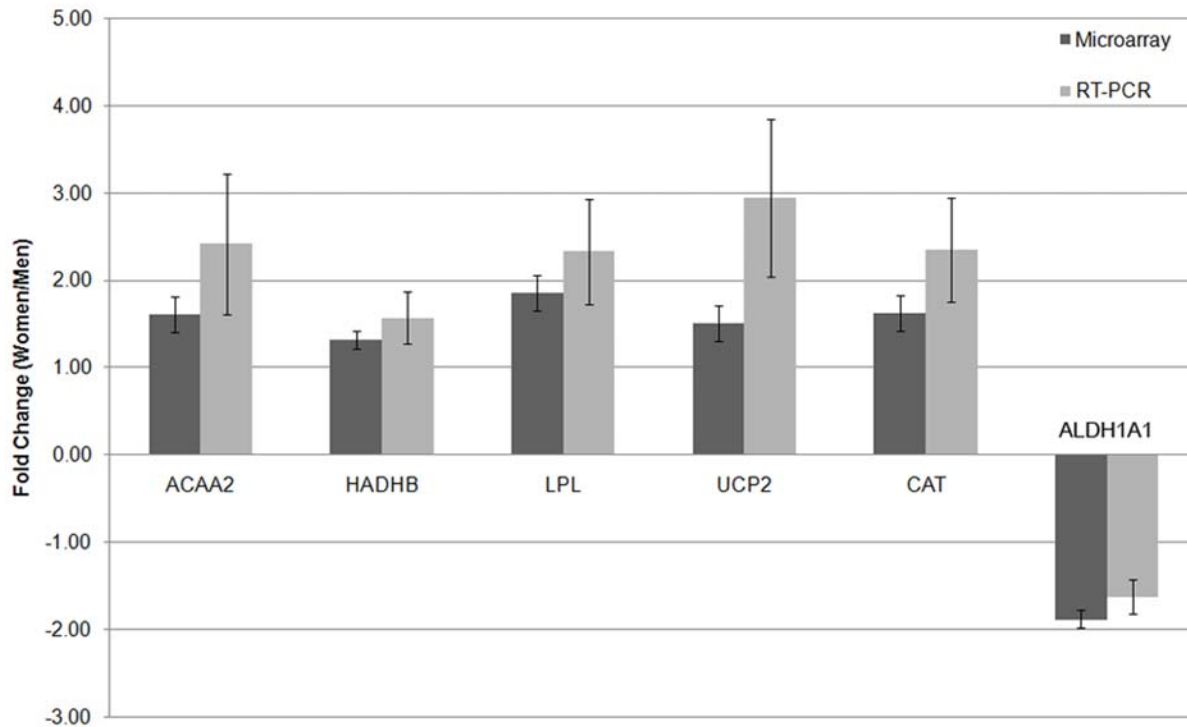

**Figure 1. Comparison of microarray data to RT-PCR results for 6 genes found to be significantly different between men and women.** Shown as fold change in women versus men. N (microarray) = 12 men, 12 women; N (RT-PCR) = 12 men, 12 women. doi:10.1371/journal.pone.0006335.g001

system (Bio-Rad Laboratories, Hercules, CA). One-step TaqMan® RT-PCR Master Mix Reagent (Roch, Branchburg, New Jersey) was combined with RNA, target gene primers and probes, and internal standard gene primers and probes in the same reaction. Specific primers and probes to each target gene were designed based on the cDNA sequence in GenBank (<http://www.ncbi.nlm.nih.gov/entrez/query.fcgi>) with primer 3 designer (<http://frodo.wi.mit.edu/cgi-bin/primer3/primer3www.cgi>). Their specificity was monitored using Blast (<http://www.ncbi.nlm.nih.gov/BLAST/>). Primer sequences are listed in Table 2.

All probes were dual-labeled with fluorophores, with a fluorescent reporter dye at the 5' end (FAM, TET, HEX or TAMRA) and a corresponding quencher dye at its 3' end (3BHQ-1 or 3BHQ-2). Human  $\beta$ 2-microglobulin ( $\beta$ 2-M) was used as an internal standard as there was no significant sex difference in expression (data not shown). All samples were run in duplicate simultaneously with RNA- and RT-negative controls. Fluorescence emission was detected through a filter corresponding to the reporter dye at the 5' end of each probe, and  $C_T$  was automatically calculated and displayed.

#### Western blot analysis

Thirty mg of tissue was used for protein content analysis. Muscle tissue was homogenized in a phosphate lysis buffer; 50 mM  $K_2HPO_4$ , 1 mM EDTA, pH 7.4, 0.1 mM DDT, PhosSTOP (Roach Diagnostics, Mannheim, Germany), Protease inhibitor cocktail tablets (Roach). Protein concentrations were calculated by Bradford assay (Biorad) and equal amounts of protein were boiled in Laemmli buffer, resolved by SDS-PAGE, transferred to nitrocellulose paper and immunoblotted with desired antibodies. Primary antibodies; HADHB, ACAA2, catalase, PPAR $\delta$ , MHC I, MHC II and  $\beta$ -actin were all purchased from (Abcam, Cambridge, MA). Secondary antibodies conjugated

to horseradish peroxidase (Amersham Bioscience, UK) and specific antibody binding was detected using the chemiluminescence detection reagent ECL+ (Amersham BioScience, UK). Scanned films were analyzed using ImageJ 1.40 software (Wayne Rasband National Institute of Health, USA).

#### Statistical analysis

All statistical analyses, for mRNA content of the genes, was performed on linear data  $2^{-C_T}$  for evaluation of internal standards,  $2^{-\Delta C_T}$  for target gene normalized with internal reference [44]. Data on sex differences about target gene mRNA content were analyzed using a Student's *t* test. All results from evaluation of target gene are expressed as mean  $\pm$  SEM, using  $2^{-\Delta C_T}$ . Western blot data was normalized by the loading control ( $\beta$ -actin) and a Student's *t* test was performed to test for a difference between men and women. Data are presented as means  $\pm$  SEM. The data regarding muscle fiber composition were analyzed using a single factor ANOVA and expressed as mean  $\pm$  SEM. All analyses were done using statistics software (Statistica version 5.0; Statsoft, Tulsa, OK). Statistical significance was set at  $\alpha \leq 0.05$ .

#### Results

##### Sex alters mRNA content in skeletal muscle; microarray

The mRNA abundance in skeletal muscle between men and women was significantly different for 66 genes (using a stringent  $NLOGP \geq 4$ , fold-change  $> 1.2$ ), after Y-linked genes were removed (Table 3; GEO accession #GSE14901). Of these 66 genes, 49 genes have known functions in metabolism, mitochondrial function, transport, protein biosynthesis, cell proliferation, signal transduction pathways, transcription and translation (Table 3). Conversely, 17 of the genes identified in the current analysis do

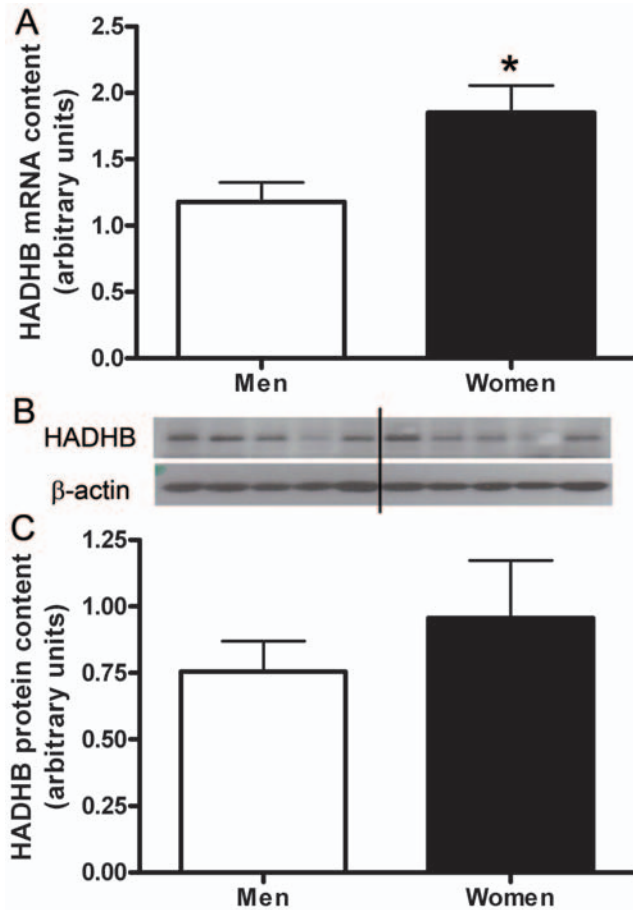

**Figure 2. Sex differences in HADHB.** Differences in HADHB muscle mRNA content between men and women shown by Real time RT-PCR, adjusted to  $\beta$ -M mRNA (A). Protein content of HADHB in skeletal muscle of men and women, adjusted to  $\beta$ -actin (B,C). Lanes 1–4 are men, lanes 5–8 women, representative of all blots. N=12 men and 12 women. \* $P$ <0.05.

doi:10.1371/journal.pone.0006335.g002

not have known functions. Of the 49 genes with known function, women had higher content of 25 genes (mean  $1.7 \pm 0.4$ ), compared to men. Subsequently, women have lower content of 24 genes (mean  $-2.1 \pm 2.0$ ), compared to men.

iPath<sup>TM</sup> (Invitrogen) was used to compare differentially regulated genes against 225 signaling and metabolic human biological pathway maps, and these genes were found to be involved in 39 different signal transduction pathways. Differentially regulated genes were also run against a Connectivity Map to compare the expression profile to that of known drug treatments, genes, and diseases. Interestingly, differentially expressed genes between genders were found to share a similar expression pattern with the transcript profiling of estradiol (which is estrogenic), genistein (which could be estrogenic or anti-estrogenic) and tretinoin (a vitamin A derivative) drug treatments.

### Sex alters mRNA content of genes involved metabolism and mitochondrial biogenesis

Sex altered content of six genes involved in metabolism and three genes involved in the function of mitochondria and energy production (Table 3). HADHB (trifunctional protein  $\beta$ ), ACAA2, LPL, UCP-2, catalase, aldehyde dehydrogenase 2 family (ALDH2), and argininosuccinate synthase 1 (ASS1) all had higher

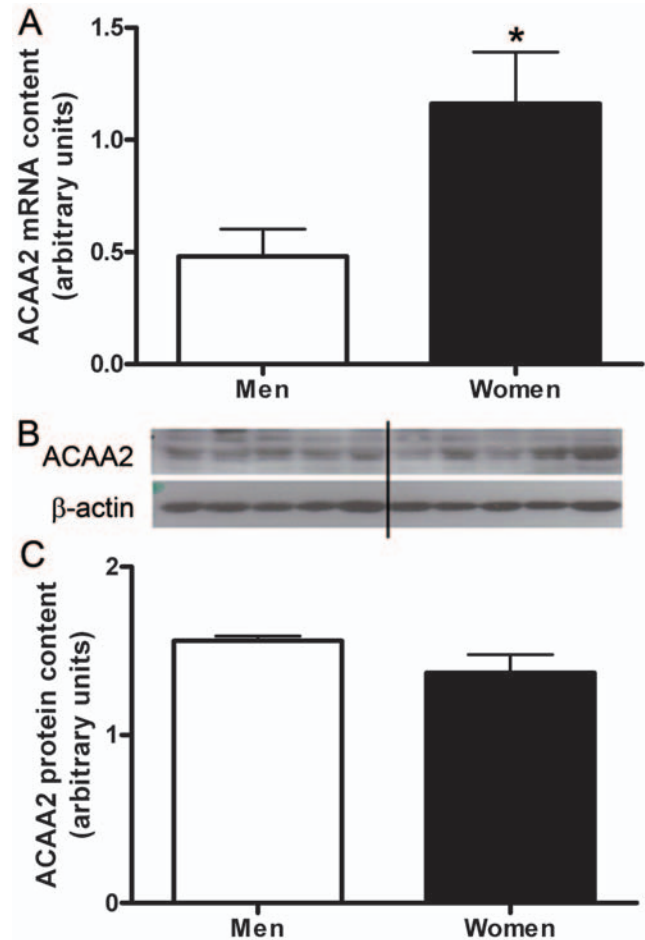

**Figure 3. Sex differences in ACAA2.** Differences in ACAA2 muscle mRNA content between men and women shown by Real time RT-PCR, adjusted to  $\beta$ -M mRNA (A). Protein content of ACAA2 in skeletal muscle of men and women, adjusted to  $\beta$ -actin (B,C). Lanes 1–4 are men, lanes 5–8 women, representative of all blots. N=12 men and 12 women. \* $P$ <0.05.

doi:10.1371/journal.pone.0006335.g003

mRNA content in women compared to men by 1.3- to 2.2-fold. ALDH1A1 and ATP synthase mitochondrial F1 complex assembly factor 1 were significantly lower in women compared to men by 1.9 fold and 1.5-fold respectively (Table 3).

The mRNA content of genes involved in lipid metabolism, HADHB, ACAA2, and catalase, were confirmed by real time RT-PCR (Figure 1, 2a, 3a, 4a) using *study 2* samples. The mRNA content of UCP-2, LPL, and ALDH1A1 were also confirmed by real time RT-PCR (Figure 1, 5), and fold-change of the RT-PCR results correlated to the fold-change reported by the microarray (Figure 1).

To determine if sex differences in mRNA content were consistent with protein content we resolved HADHB, ACAA2, and catalase on a western blot and found no significant difference in protein content between men and women (Figure 2c, 3c, 4c; *study 2 samples*).

### Sex difference in muscle fiber composition

Fiber composition data for a subset of *study 1* subjects has been published previously [30]. Fiber composition data for a subset of *study 2* subjects was compared to *study 1* and when no differences were observed the data was combined to increase the n-value and the data is presented in table 4. Fiber data was consistent with

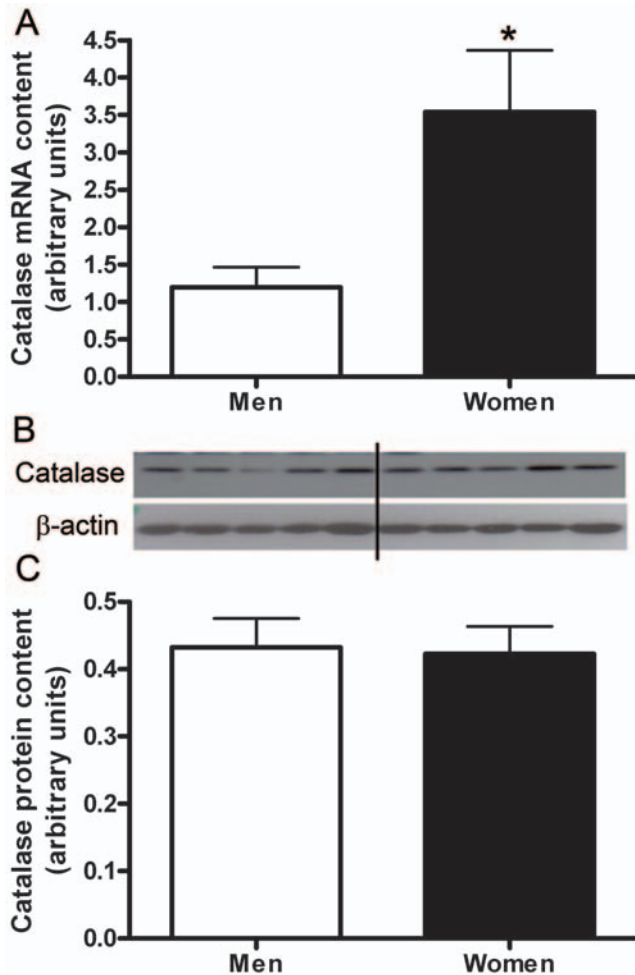

**Figure 4. Sex differences in catalase.** Differences in Catalase mRNA content between men and women shown by Real time RT-PCR, adjusted to  $\beta$ -M mRNA (A). Protein content of catalase in skeletal muscle of men and women, adjusted to  $\beta$ -actin (B,C). Lanes 1–4 are men, lanes 5–8 women, representative of all blots. N = 12 men and 12 women. \* $P < 0.05$ .

doi:10.1371/journal.pone.0006335.g004

other published data [4,5,26,27] showing women had a significantly higher area% of Type I fibers (women,  $32.9 \pm 1.3$ ; men,  $27.3 \pm 1.0$ ;  $P = 0.001$ ) and a significantly lower area% of Type II fibers (type IIa+type IIx) (women,  $67.1 \pm 1.3$ ; men,  $72.7 \pm 1.0$ ;  $P = 0.001$ ) than men (Table 4). Women had significantly smaller mean individual fiber area for type IIa (women,  $4777.2 \pm 347.8 \mu\text{m}^2$ ; men,  $6066.9 \pm 408.3.8 \mu\text{m}^2$ ;  $P = 0.013$ ), while there was no significant difference in the type I fiber area or type IIx between women and men (Table 4).

#### Sex differences in mRNA content for genes involved in muscle type determination

The stringent microarray analysis revealed no significant genes related to muscle type determination. A more biased targeted RT-PCR approach resulted in the content of MHC I mRNA being significantly higher in the skeletal muscle of women ( $2.6 \pm 0.7$  fold,  $P = 0.035$ ) than men (Figure 6a). No significant difference in the mRNA content of MHCIIa or MHCIIx was found between women and men (Figure 6c,d). Women had a significantly higher mRNA content of PPAR $\delta$  than men ( $2.3 \pm 0.4$  fold,  $P = 0.004$ ) (Figure 7a). There were no significant differences in the mRNA

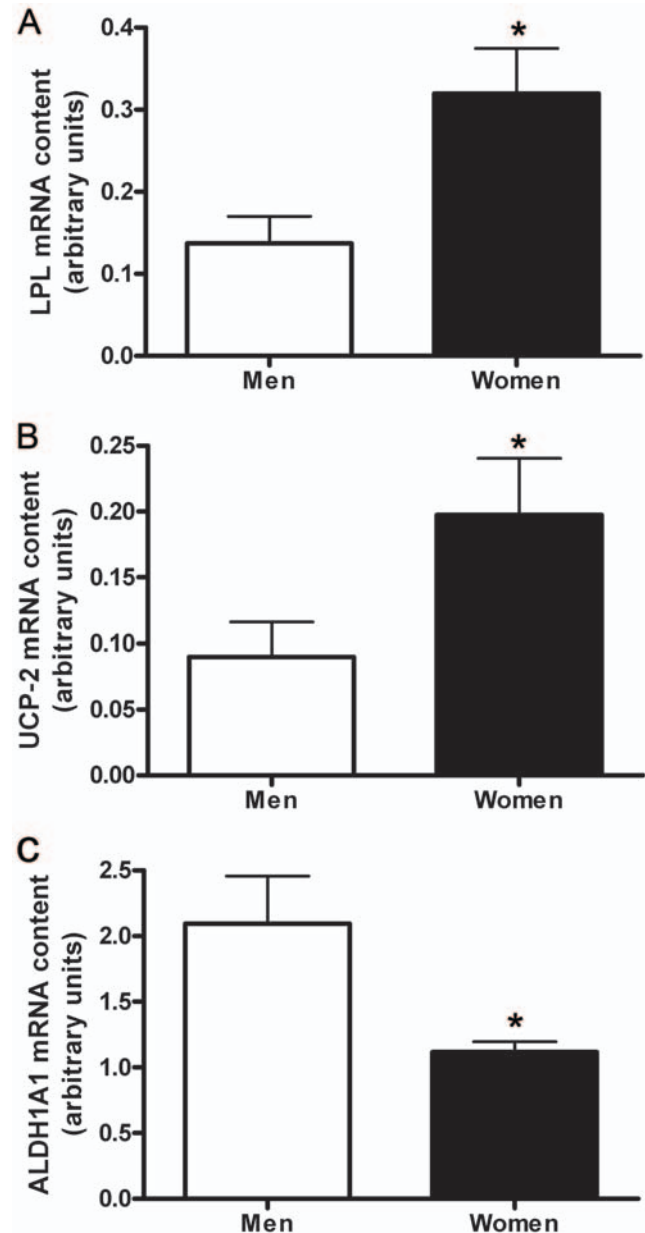

**Figure 5. Skeletal muscle mRNA content of LPL, UCP-2 and ALDH1A1 in men and women.** LPL is higher in women than men ( $P = 0.009$ ) (A). UCP-2 is higher in women than men ( $P = 0.05$ ) (B). ALDH1A1 is lower in women than men ( $P = 0.01$ ) (C).  $\beta$ -M mRNA was used as an internal standard. N = 12 men and 12 women. doi:10.1371/journal.pone.0006335.g005

content of PGC-1 $\alpha$  or myostatin in the skeletal muscle of men vs. women (Figure 8a, 9a). Western blot analysis showed no significant sex difference in the protein content of MHC I, MHC II, PPAR $\delta$ , PGC-1 $\alpha$  or myostatin (Figure 6b,e, 7c, 8c, 9c). \*All data was acquired from study 2.

#### Discussion

The purpose of this study was to identify novel differences in genes related to metabolism, muscle development, and fiber-type determination and differentiation in mRNA and protein content in skeletal muscle between men and women at rest using microarray, Real Time-PCR analysis, and protein analysis. Microarrays are a



**Table 4.** Fiber type composition in the *vastus lateralis* muscle of women and men.

|                                             | Men (N = 10) | Women (N = 16) |
|---------------------------------------------|--------------|----------------|
| <b>Fiber type composition (area%)</b>       |              |                |
| Type I                                      | 27.3±1.0     | 32.9±1.3 *     |
| Type IIa+IIx                                | 72.7±1.0     | 67.1±1.3 *     |
| <b>Mean area per fiber (μm<sup>2</sup>)</b> |              |                |
| Type I                                      | 4218.6±225.0 | 4691.7±477.9   |
| Type IIa                                    | 6066.9±408.3 | 4777.2±347.8 * |
| Type IIx                                    | 5208.7±220.3 | 4677.7±389.8   |

Sex differences in fiber type composition between men and women. Due to experimental difficulties data is a combined subset of samples from both study #1 and study#2. Means±SEM \*P<0.05.  
doi:10.1371/journal.pone.0006335.t004

useful tool for the identification of novel mRNA expression patterns and can help to understand potential pathways involved in regulating cellular activity in skeletal muscle [33,38,45,46]. The results from these studies indicate that there are significant differences in mRNA content between men and women. Roth et al. (2002) and Welle et al. (2008) have previously shown that there are significant differences in skeletal muscle mRNA content between men and women, as well as showing sex differences are significantly greater than age and/or strength training effects on mRNA content [38,39]. Approximately 30% of the genes we found to have changed due to sex correspond to the results of Welle and colleagues [39]. Results likely vary between studies due to differences in age of the subject populations, fitness variations, low sample numbers, pooled samples on one gene chip versus individual gene chips per subject, and different gene array technology [38,39]. The methodology used in this study greatly strengthens the data regarding sex based differences in skeletal muscle mRNA for we examined over 23,000 genes with updated annotation, with 12 subjects per group (N = 24 total) hybridized to individual gene chips for analysis and used stringent statistical analysis with an NLOGP>4. The criteria for differential expression is stringent compared to other array studies that generally use an NLOGP>2, however, necessary for the most accurate unbiased account of gene content differences. For the microarray experiment we used samples from study one which included 7 women in the follicular phase and 5 women in the luteal phase, 6 on oral contraceptives and 6 not on oral contraceptives which gives a good representation of the female population. Given the high n-value of the analysis and stringent array analysis criteria we wanted to reduce any variability in gene expression due to these factors in order to only identify specific and significant gene differences that can be applied to a larger population. The goal of the microarray was not to identify genetic differences due to menstrual cycle phase but identify sex related differences between an average population of men and women. In another manuscript "in preparation" from study 2 we used a targeted PCR approach to examine differences in metabolic related genes in men compare to women in both the follicular and luteal phases of the menstrual cycle and found that menstrual cycle had little effect on metabolic related mRNA species, compared to the robust difference that sex has (Figures S1 and S2). Due to these findings, the little amount of precious human muscle sample, and the relatively consistent use of follicular phase women in other gender related studies [5,11,17,18,19,20,47] we compared the mRNA and protein of women in the follicular phase only. It is also important to note that Devries et al (2006) report no physiological difference in exercise performance due to menstrual cycle phase including average RER,

glycogen utilization, glucose rate of appearance, rate of disappearance, and metabolic clearance rate averaged over the exercise period [41].

The first focus was on the mRNA content of genes involved in intermediary substrate metabolism due to the known fact that women oxidize more fat during endurance exercise as compared with men [5,6,7,8,10,11,48]. Array results identified six genes related to metabolism that were differentially regulated between men and women. We chose to confirm the mRNA content of five of these genes by RT-PCR. Results identified a novel sex-based difference in the mRNA content of ACAA2 and HADHB (TFP-β). Also, the mRNA content for catalase, lipoprotein lipase, and uncoupling protein-2 were higher in women compared with men. Lastly, ALDH1A1 mRNA content was lower in women compared with men. There was also sex based differences in the mRNA content of genes involved in protein biosynthesis, cell proliferation, signal transduction, transcription, and translation with a particular interest in those genes which are directly involved in muscle function and/or structure.

HADHB (TFPβ) is a multi-enzyme complex found in the mitochondria that is involved in the β-oxidation of fatty acids [49]. Specifically, the TFP enzyme catalyzes the last three steps of long chain fatty acid β-oxidation for long-chain specific acyl-CoA moieties. We are the first to measure and report a sex difference in the mRNA content for this gene. An enhanced β-oxidation capacity distal to transport of FFA into the mitochondria may allow for maintenance of β-oxidation when the cell is under metabolic stress. For example, male transgenic peripheral peroxisome activating receptor knockout (PPARα<sup>-/-</sup>) animal develop severe hypoglycemia when an inhibitor of CPT activity (etomoxir) was given, yet the majority of female mice survived [50]. Furthermore, CPTII deficiency is an autosomal recessive condition and yet many more cases have been documented in men as compared with women, possible due to enhanced β-oxidation capacity in women. Others have reported that the short-chain specific isoform of HAD (SCHAD) has higher mRNA and protein abundance in women compared with men [2,51].

These results also indicate a significant sex based difference in the mRNA content of ACAA2 (acetyl-Coenzyme A acyltransferase 2). ACAA2 is one of two isoforms of ACAA, which is an intracellular enzyme that biosynthesizes cholesteryl esters. Specifically, ACAA is involved in storing cholesteryl esters as lipid droplets, in absorbing dietary cholesterol, and in providing cholesteryl esters as part of the core lipid for lipoprotein synthesis and assembly [52,53,54]. Although ACAA appears to be present in many cell types such as hepatocytes, adrenal cells, skin cells, intestinal enterocytes, neurons, and macrophages it has not been well characterized in skeletal muscle [55,56]. In the aforementioned cell types it has been shown that the ACAA1 isoform is the predominant enzyme compared to ACAA2 [55]. Our gene array results suggest that men and women have no significant difference in the expression of ACAA1 but women have an increased expression of ACAA2 compared to men. Therefore, the total ACAA expression should be significantly higher in women than men, which may explain why lipids are more readily available for substrate utilization during endurance exercise in women. Future studies are needed to determine the expression profile of ACAA1 and ACAA2 in human skeletal muscle as well as the importance of ACAA2 over-expression in women compared to men.

Catalase is one of the three primary antioxidant enzymes. RT-PCR confirmed that mRNA content for catalase is significantly higher in women compared to men. Interestingly, Fano et al (2001) have shown that the enzyme activity of catalase, in the *vastus lateralis*, is significantly higher in women than men [57]. Sex

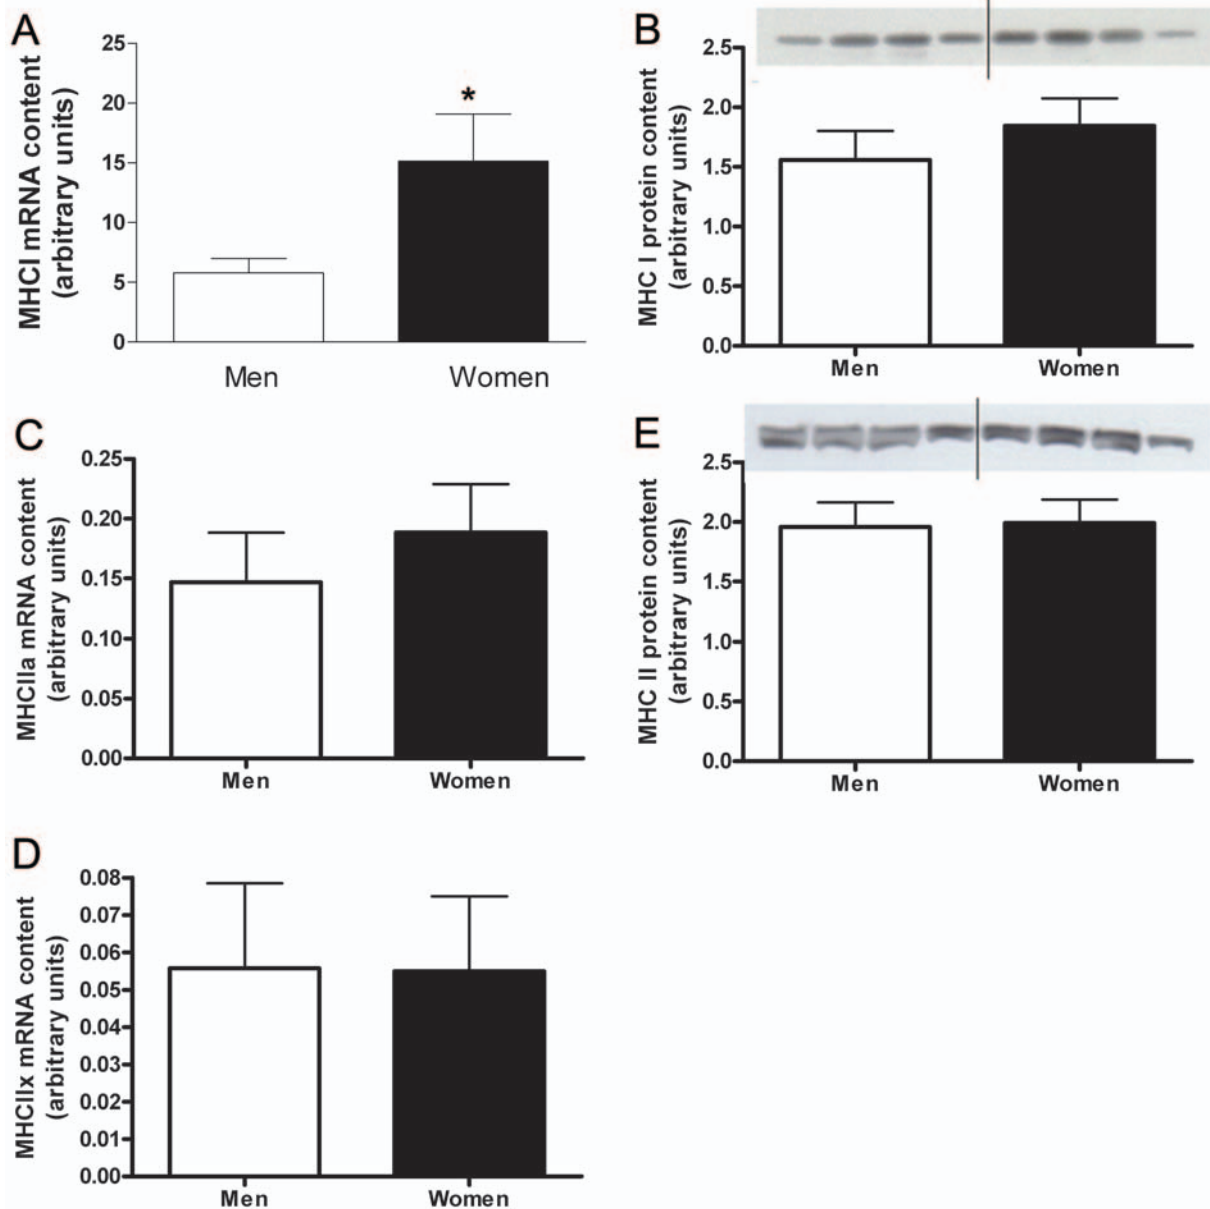

**Figure 6. Sex differences in MHC isoforms.** Differences in MHC I muscle mRNA content between men and women shown by Real time RT-PCR, adjusted to 28 S rRNA (A). Protein content of MHC I in skeletal muscle of men and women, adjusted to  $\beta$ -actin (B). MHC IIa (C) and MHC IIx (D) muscle mRNA content in men and women shown by Real time RT-PCR, adjusted to 28 S rRNA. Protein content of MHC II in skeletal muscle of men and women (E). Lanes 1–4 are men, lanes 5–8 women, representative of all blots. N = 12 men and 12 women. \* $P < 0.05$ . doi:10.1371/journal.pone.0006335.g006

differences have also been observed in other antioxidant enzyme, including manganese-superoxide dismutase [58], suggesting that women are better protected against reactive oxygen species (ROS) as compared with men. We also demonstrated that mRNA content for UCP2 was higher in women compared to men. UCP's can affect energy metabolism efficiency by uncoupling ATP production from mitochondrial respiration. UCP2 is involved in the regulation of energy metabolism and might play a role in obesity [59,60,61]. UCP2 has also been suggested to affect the production of reactive oxygen species (ROS) [62,63,64], and regulate the [ATP]/[ADP] ratio [64,65,66]. Although we are the first to show a sex specific difference in mRNA content in the *vastus lateralis*, this may help to explain why young women are protected against ROS (reviewed in [67]). Furthermore, if UCP2 does play a

role in obesity the higher expression in women might help to regulate lipid oxidation.

ALDH1A1 is an isoform of the aldehyde dehydrogenase superfamily primarily responsible for the oxidation of endogenous and exogenous aliphatic and aromatic aldehydes including acetaldehyde, benzaldehyde, 4-hydroxynonenal, malondialdehyde, and retinaldehyde [68,69,70]. Recently ALDH1A1 was also shown to convert 3-deoxyglucosone into 2-keto-3-deoxyglucuronate [71]. In this study we found that the mRNA content was lower in women compared with men, suggesting that men might be able to metabolize aldehydes (i.e. alcohol) more efficiently than women. ALDH1A1 has not been well characterized in humans, let alone skeletal muscle, but in the mouse liver and human colon there appears to be no sex differences in activity [72,73]. Further

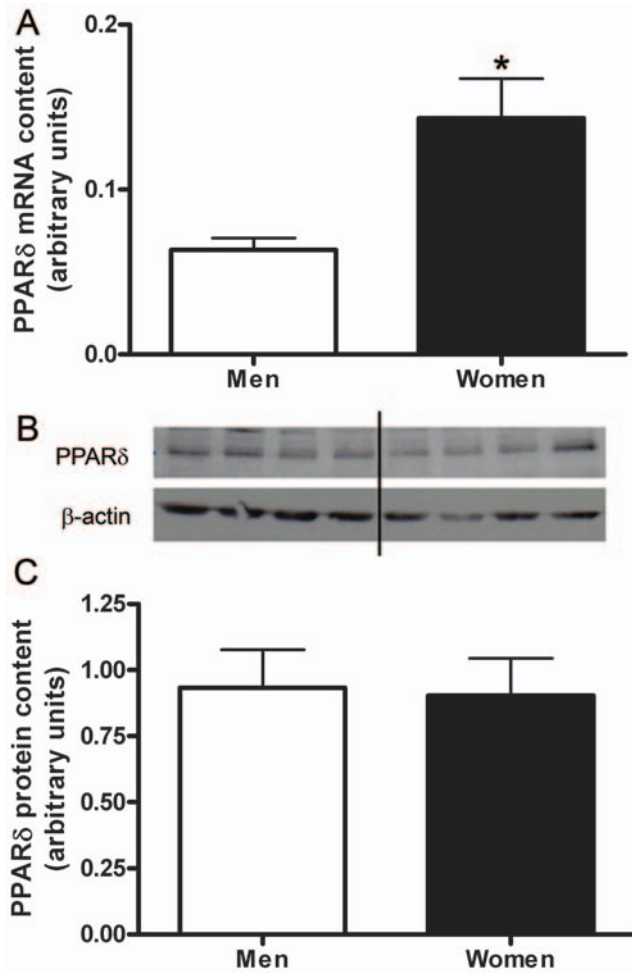

**Figure 7. Sex differences in PPAR $\delta$ .** Differences in PPAR $\delta$  muscle mRNA content between men and women shown by Real time RT-PCR, adjusted to  $\beta$ -2-M mRNA (A). Protein content of PPAR $\delta$  in skeletal muscle of men and women, adjusted to  $\beta$ -actin (B,C). Lanes 1–4 are men, lanes 5–8 women, representative of all blots. N=12 men and 12 women. \*P<0.05.

doi:10.1371/journal.pone.0006335.g007

studies into the implications of ALDH1A1 mRNA sex differences in skeletal muscle need to be conducted.

These results also showed sex specific differences in genes involved in cell transport, protein biosynthesis, cell proliferation, signal transduction pathways, transcription and translation. Of interest, women had a 2.2-fold reduction in the solute carrier family 1, member 4 that is involved in glutamate/neutral amino acid transport which could be important in metabolism. Women had a 1.7-fold increase in mRNA content of angiopoietin 1, a factor involved in increasing vascularization to a specific tissue, in this case, muscle; however, there does not seem to be a significant difference in capillarization of the *tibialis anterior* or *vastus lateralis* muscle of women compared to men [74,75]. Women also had a 1.7- and 1.5-fold reduction in Dishevelled associated activator of morphogenesis 2, and spectrin- beta- non-erythrocytic 1 which are involved in actin cytoskeleton organization and biogenesis, and barbed-end actin filament capping, respectively. Both are important in muscle cell shape and function. There was an interesting trend in the expression of signal transduction genes and transcription factor genes. Women had a significant up-regulation of the majority of signal transduction related genes and a

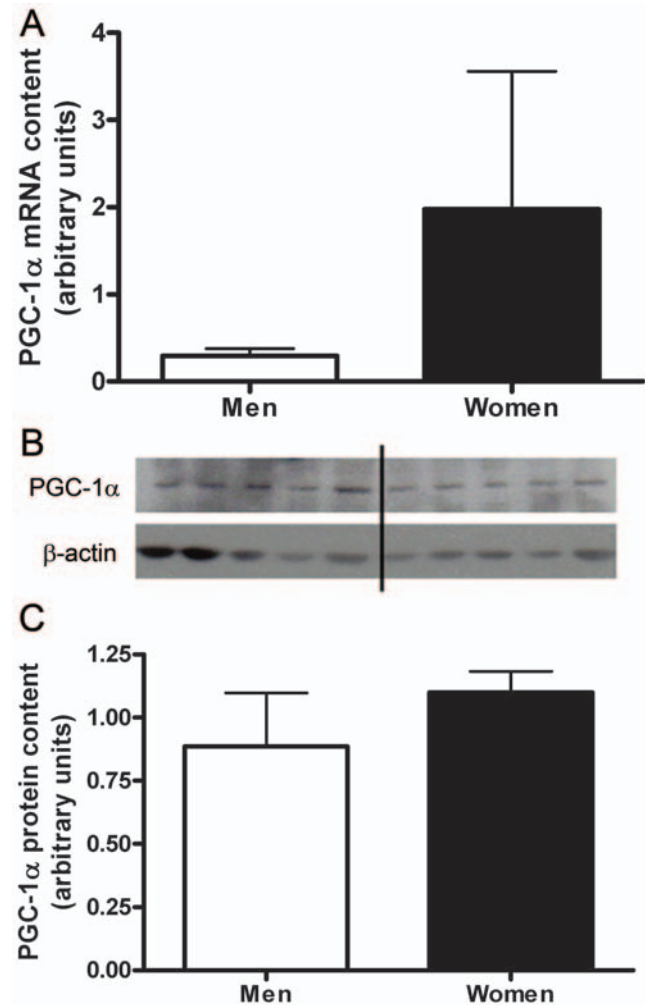

**Figure 8. Sex differences in PGC1 $\alpha$ .** Differences in PGC1 $\alpha$  muscle mRNA content between men and women shown by Real time RT-PCR, adjusted to  $\beta$ -2-M mRNA (A). Protein content of PGC1 $\alpha$  in skeletal muscle of men and women, adjusted to  $\beta$ -actin (B,C). Lanes 1–4 are men, lanes 5–8 women, representative of all blots. N=12 men and 12 women. \*P<0.05.

doi:10.1371/journal.pone.0006335.g008

significant down-regulation of the majority of transcription factor genes. Despite these trends, there was no evidence that one signal transduction pathway was favored over another as the identified genes spanned multiple pathways including the MAPK pathway, frizzled signaling pathway, G-protein coupled receptor protein signaling pathway, and insulin receptor signaling pathway.

It is important to note that gene array analysis works on the assumption that basal mRNA equates into changes at the protein level and thus activity level. However, recent studies have been demonstrating that is not always the case. For example Kiens et al. (2004) demonstrated that women have a significantly higher LPL mRNA content; however there was no observed differences in LPL activity between men and women [47]. Similarly, Roepstorff et al. demonstrated that although mRNA and protein expression of hormone sensitive lipase (HSL) was higher in women, phosphorylation activation was significantly higher in men [11]. Another study in skeletal muscle biology also found discrepancies in the correlation between mRNA and protein content of a number of genes related to fatty acid oxidation [76]. Part of the discrepancy between mRNA abundance and protein and enzyme

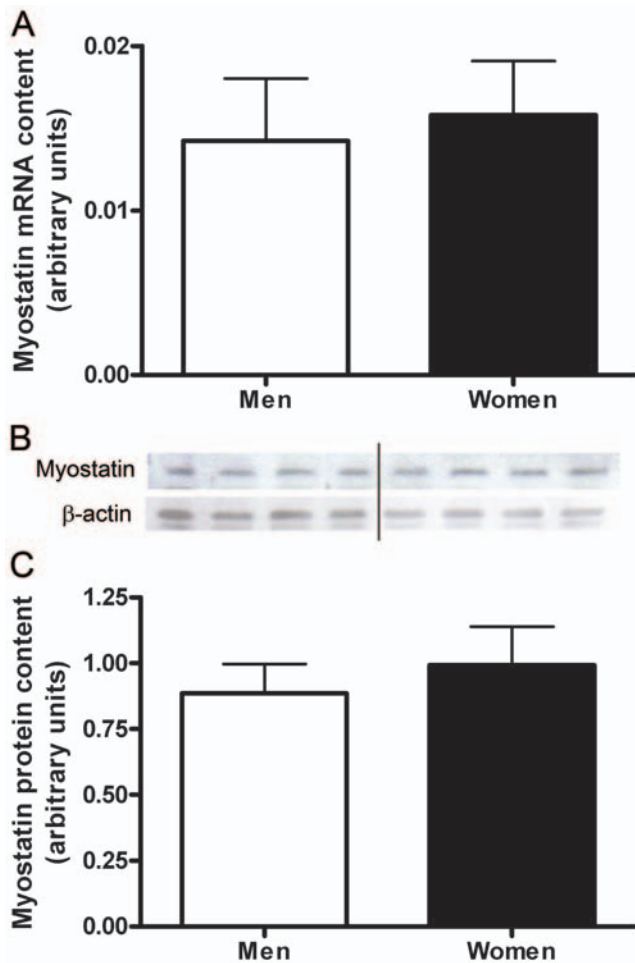

**Figure 9. Sex differences in myostatin.** Differences in myostatin muscle mRNA content between men and women shown by Real time RT-PCR, adjusted to  $\beta$ -M mRNA (A). Protein content of myostatin in skeletal muscle of men and women, adjusted to  $\beta$ -actin (B,C). Lanes 1–4 are men, lanes 5–8 women, representative of all blots. N = 12 men and 12 women.

doi:10.1371/journal.pone.0006335.g009

assays may relate to higher variance in Western blots and activity assay technique, and/or that the transcriptome abundance regulates multiple interacting and synergistic pathways that combine to influence flux through metabolic pathways at the protein level that is below the detectable threshold for statistical changes in a single given protein to be manifested. In order to fully understand cellular differences between men and women it is important to understand pre-translational (mRNA abundance), translational (protein) and post-translational (phosphorylation) levels of control.

It has recently been hypothesized that some of the sex differences in exercise substrate selection may be due to fiber-type compositional differences [32]. Subject fiber type characteristics were the same in this study as previously reported [4,5,26,27,30,32]; specifically, the proportionate area (area%) of type I fibers was higher, while that of type II fibers was lower, in women compared with men. Previous findings of a sex difference in type I fiber proportion [25,28,29,32] and a larger type I fiber area [4,5,27,30], in women as compared with men were not confirmed. Nevertheless, it is the proportion of the total muscle area represented by a given fiber type (area X proportion = area%)

that should determine the overall abundance of a given transcript or protein in a homogenate of skeletal muscle. Examination of mRNA expression of myosin heavy chain genes, which are specifically expressed in their corresponding muscle fiber types [77], are good markers of the terminal differentiation of muscle fibers. In this study, we found a significantly higher mRNA content of MHCI and a similar mRNA content of MHCIIa and MHCIIx in the skeletal muscles of women compared with men. The difference in MHCI mRNA did not translate into differences in MHCI protein expression, consistent with previous findings [30].

Similarly, we found sex differences in the mRNA content, but not the protein content, of PPAR $\delta$ ; which plays a role in the conversion of muscle fiber type II into type I and maintenance of the number of type I fibers [78], and increases the capacity for oxidative metabolism of muscle fibers through hyperplasia of type I fibers [79,80] in transgenic mice.

Strong evidence in transgenic mice [81], and controversial evidence in humans [82,83,84], suggests that PGC-1 $\alpha$  is important in the determination of muscle fiber type and induces a fiber type transformation from type II into type I muscle fibers. We did not find an influence of sex on the mRNA or protein content of PGC-1 $\alpha$  in skeletal muscle in spite of the fact that women had a higher% area of type I fibers. We also found that there was no sex difference in the mRNA content of myostatin, a negative regulator of skeletal muscle growth [85,86,87].

At rest, there are no significant differences in protein content of the select genes examined, which are involved in metabolism or fiber type. Consistently, there are no observed sex differences in substrate utilization at rest [7,8,88,89,90]. However, mRNA content suggest that men and women are “primed” differently for specific cellular events, and future studies are needed to determine if exercise induces changes at the translational and post-translational levels.

Overall, these results identified sex-based differences in mRNA content of metabolic related genes that might lead the way towards an understanding of the sex-based differences in metabolic fuel selection during endurance exercise. Furthermore, this study emphasizes the importance of the influence of sex based differences in gene expression. At the mRNA level there are no inconsistencies in our data or in the literature, which supports that women have higher mRNA abundance for genes involved in fat metabolism as compared with men. Furthermore, men and women demonstrate varied regulation of genes involved in mitochondrial function, transport, protein biosynthesis, cell proliferation, signal transduction pathways, transcription and translation, even at rest.

## Supporting Information

**Table S1** Affymetrix gene array analysis comparing resting human skeletal muscle of women with men. Original Affymetrix data. LogFC; Log fold-change, NLogP; negative log of the p value (>4.0), F; Woman M; Man.

Found at: doi:10.1371/journal.pone.0006335.s001 (0.04 MB XLS)

**Figure S1** Menstrual cycle differences in resting mRNA content of genes related to substrate metabolism. Genes are expressed as mean fold difference follicular/luteal  $\pm$  SEM.  $\beta$ -M mRNA was used as an internal standard. N = 12 men and 12 women. \*P < 0.05.

Found at: doi:10.1371/journal.pone.0006335.s002 (1.37 MB TIF)

**Figure S2** Sex differences in resting mRNA content of genes related to substrate metabolism. Genes are expressed as mean fold

difference women/men  $\pm$  SEM.  $\beta$ 2-M mRNA was used as an internal standard. N = 12 men and 12 women. \*P < 0.05.

Found at: doi:10.1371/journal.pone.0006335.s003 (1.83 MB TIF)

## Acknowledgments

We acknowledge Nobuo Yasuda and Elisa Glover for collection of the samples used for the gene array analysis (study 1), and Nobuo Yasuda for

histochemical staining. We acknowledge Dr. Mazen Hamadeh for collection of study 2 samples.

## Author Contributions

Conceived and designed the experiments: ACM MAT. Performed the experiments: ACM MHF RJL. Analyzed the data: ACM MHF ARV XAQ. Contributed reagents/materials/analysis tools: RJI MAT. Wrote the paper: ACM. Provided funding: MAT. Edited the paper: MAT.

## References

- Janssen I, Heymsfield SB, Baumgartner RN, Ross R (2000) Estimation of skeletal muscle mass by bioelectrical impedance analysis. *J Appl Physiol* 89: 465–471.
- Green HJ, Fraser IG, Ranney DA (1984) Male and female differences in enzyme activities of energy metabolism in vastus lateralis muscle. *J Neurol Sci* 65: 323–331.
- Komi PV, Karlsson J (1978) Skeletal muscle fibre types, enzyme activities and physical performance in young males and females. *Acta Physiol Scand* 103: 210–218.
- Simoneau JA, Lortie G, Boulay MR, Thibault MC, Theriault G, et al. (1985) Skeletal muscle histochemical and biochemical characteristics in sedentary male and female subjects. *Can J Physiol Pharmacol* 63: 30–35.
- Carter SL, Rennie C, Tarnopolsky MA (2001) Substrate utilization during endurance exercise in men and women after endurance training. *Am J Physiol Endocrinol Metab* 280: E898–907.
- Friedlander AL, Casazza GA, Horming MA, Huie MJ, Piacentini MF, et al. (1998) Training-induced alterations of carbohydrate metabolism in women: women respond differently from men. *J Appl Physiol* 85: 1175–1186.
- Horton TJ, Pagliassotti MJ, Hobbs K, Hill JO (1998) Fuel metabolism in men and women during and after long-duration exercise. *J Appl Physiol* 85: 1823–1832.
- Tarnopolsky IJ, MacDougall JD, Atkinson SA, Tarnopolsky MA, Sutton JR (1990) Gender differences in substrate for endurance exercise. *J Appl Physiol* 68: 302–308.
- Kiens B (1997) Effect of endurance training on fatty acid metabolism: local adaptations. *Med Sci Sports Exerc* 29: 640–645.
- Riddell MC, Partington SL, Stupka N, Armstrong D, Rennie C, et al. (2003) Substrate utilization during exercise performed with and without glucose ingestion in female and male endurance trained athletes. *Int J Sport Nutr Exerc Metab* 13: 407–421.
- Roepstorff C, Donsmark M, Thiele M, Vistisen B, Stewart G, et al. (2006) Sex differences in hormone-sensitive lipase expression, activity, and phosphorylation in skeletal muscle at rest and during exercise. *Am J Physiol Endocrinol Metab* 291: E1106–1114.
- Ellis GS, Lanza-Jacoby S, Gow A, Kendrick ZV (1994) Effects of estradiol on lipoprotein lipase activity and lipid availability in exercised male rats. *J Appl Physiol* 77: 209–215.
- Kendrick ZV, Ellis GS (1991) Effect of estradiol on tissue glycogen metabolism and lipid availability in exercised male rats. *J Appl Physiol* 71: 1694–1699.
- Kendrick ZV, Steffen CA, Rumsey WL, Goldberg DI (1987) Effect of estradiol on tissue glycogen metabolism in exercised oophorectomized rats. *J Appl Physiol* 63: 492–496.
- Kiens B, Roepstorff C, Glatz JF, Bonen A, Schjerling P, et al. (2004) Lipid-binding proteins and lipoprotein lipase activity in human skeletal muscle: influence of physical activity and gender. *J Appl Physiol* 97: 1209–1218.
- Binnert C, Koistinen HA, Martin G, Andreelli F, Ebeling P, et al. (2000) Fatty acid transport protein-1 mRNA expression in skeletal muscle and in adipose tissue in humans. *Am J Physiol Endocrinol Metab* 279: E1072–1079.
- Roepstorff C, Schjerling P, Vistisen B, Madsen M, Steffensen CH, et al. (2005) Regulation of oxidative enzyme activity and eukaryotic elongation factor 2 in human skeletal muscle: influence of gender and exercise. *Acta Physiol Scand* 184: 215–224.
- Mittendorfer B, Horowitz JF, Klein S (2002) Effect of gender on lipid kinetics during endurance exercise of moderate intensity in untrained subjects. *Am J Physiol Endocrinol Metab* 283: E58–65.
- Steffensen CH, Roepstorff C, Madsen M, Kiens B (2002) Myocellular triacylglycerol breakdown in females but not in males during exercise. *Am J Physiol Endocrinol Metab* 282: E634–642.
- Roepstorff C, Steffensen CH, Madsen M, Stallknecht B, Kanstrup IL, et al. (2002) Gender differences in substrate utilization during submaximal exercise in endurance-trained subjects. *Am J Physiol Endocrinol Metab* 282: E435–447.
- Mannion AF, Dumas GA, Cooper RG, Espinosa FJ, Faris MW, et al. (1997) Muscle fibre size and type distribution in thoracic and lumbar regions of erector spinae in healthy subjects without low back pain: normal values and sex differences. *J Anat* 190 (Pt 4): 505–513.
- Hards JM, Reid WD, Pardy RL, Pare PD (1990) Respiratory muscle fiber morphometry. Correlation with pulmonary function and nutrition. *Chest* 97: 1037–1044.
- Miller AE, MacDougall JD, Tarnopolsky MA, Sale DG (1993) Gender differences in strength and muscle fiber characteristics. *Eur J Appl Physiol Occup Physiol* 66: 254–262.
- Howell D (1994) Statistical analysis of compositional data in anatomy. *Anat Rec* 240: 625–631.
- Brooke MH, Engel WK (1969) The histographic analysis of human muscle biopsies with regard to fiber types. 1. Adult male and female. *Neurology* 19: 221–233.
- Esbjornsson-Liljedahl M, Sundberg CJ, Norman B, Jansson E (1999) Metabolic response in type I and type II muscle fibers during a 30-s cycle sprint in men and women. *J Appl Physiol* 87: 1326–1332.
- Esbjornsson M, Sylven C, Holm I, Jansson E (1993) Fast twitch fibres may predict anaerobic performance in both females and males. *Int J Sports Med* 14: 257–263.
- Simoneau JA, Bouchard C (1989) Human variation in skeletal muscle fiber-type proportion and enzyme activities. *Am J Physiol* 257: E567–572.
- Staron RS, Hagerman FC, Hikida RS, Murray TF, Hostler DP, et al. (2000) Fiber type composition of the vastus lateralis muscle of young men and women. *J Histochem Cytochem* 48: 623–629.
- Yasuda N, Glover EI, Phillips SM, Isfort RJ, Tarnopolsky MA (2005) Sex-based differences in skeletal muscle function and morphology with short-term limb immobilization. *J Appl Physiol* 99: 1085–1092.
- Costill DL, Daniels J, Evans W, Fink W, Krahenbuhl G, et al. (1976) Skeletal muscle enzymes and fiber composition in male and female track athletes. *J Appl Physiol* 40: 149–154.
- Roepstorff C, Thiele M, Hillig T, Pilegaard H, Richter EA, et al. (2006) Higher skeletal muscle  $\alpha$ 2AMPK activation and lower energy charge and fat oxidation in men than in women during submaximal exercise. *J Physiol* 574: 125–138.
- Mahoney DJ, Parise G, Melov S, Safdar A, Tarnopolsky MA (2005) Analysis of global mRNA expression in human skeletal muscle during recovery from endurance exercise. *Faseb J*.
- Chen YW, Hubal MJ, Hoffman EP, Thompson PD, Clarkson PM (2003) Molecular responses of human muscle to eccentric exercise. *J Appl Physiol* 95: 2485–2494.
- Zamboni AC, McDearmon EL, Salomonis N, Vranizan KM, Johansen KL, et al. (2003) Time- and exercise-dependent gene regulation in human skeletal muscle. *Genome Biol* 4: R61.
- Urso ML, Scrimgeour AG, Chen YW, Thompson PD, Clarkson PM (2006) Analysis of human skeletal muscle after 48 h immobilization reveals alterations in mRNA and protein for extracellular matrix components. *J Appl Physiol* 101: 1136–1148.
- Urso ML, Clarkson PM, Hittel D, Hoffman EP, Thompson PD (2005) Changes in ubiquitin proteasome pathway gene expression in skeletal muscle with exercise and statins. *Arterioscler Thromb Vasc Biol* 25: 2560–2566.
- Roth SM, Ferrell RE, Peters DG, Metter EJ, Hurley BF, et al. (2002) Influence of age, sex, and strength training on human muscle gene expression determined by microarray. *Physiol Genomics* 10: 181–190.
- Welle S, Tawil R, Thornton CA (2008) Sex-related differences in gene expression in human skeletal muscle. *PLoS ONE* 3: e1385.
- Yoshioka M, Boivin A, Bolduc C, St-Amant J (2007) Gender difference of androgen actions on skeletal muscle transcriptome. *J Mol Endocrinol* 39: 119–133.
- Devries MC, Hamadeh MJ, Phillips SM, Tarnopolsky MA (2006) Menstrual Cycle Phase and Sex Influence Muscle Glycogen Utilization and Glucose Turnover During Moderate Intensity Endurance Exercise. *Am J Physiol Regul Integr Comp Physiol*.
- Hinkle RT, Lefever FR, Dolan ET, Reichart DL, Dietrich JA, et al. (2007) Corticotrophin releasing factor 2 receptor agonist treatment significantly slows disease progression in mdx mice. *BMC Med* 5: 18.
- Mahoney DJ, Carey K, Fu MH, Snow R, Cameron-Smith D, et al. (2004) Real-time RT-PCR analysis of housekeeping genes in human skeletal muscle following acute exercise. *Physiol Genomics* 18: 226–231.
- Livak KJ, Schmittgen TD (2001) Analysis of relative gene expression data using real-time quantitative PCR and the  $2^{-\Delta\Delta C_T}$  Method. *Methods* 25: 402–408.
- Haslett JN, Sanoudou D, Kho AT, Han M, Bennett RR, et al. (2003) Gene expression profiling of Duchenne muscular dystrophy skeletal muscle. *Neurogenetics* 4: 163–171.



46. Sterrenburg E, Turk R, t Hoen PA, van Deutekom JC, Boer JM, et al. (2004) Large-scale gene expression analysis of human skeletal myoblast differentiation. *Neuromuscul Disord* 14: 507–518.
47. Kiens B, Roepstorff C, Glatz JF, Bonen A, Schjerling P, et al. (2004) Lipid binding proteins and lipoprotein lipase activity in human skeletal muscle: Influence of physical activity and gender. *J Appl Physiol*.
48. Melanson EL, Sharp TA, Seagle HM, Horton TJ, Donahoo WT, et al. (2002) Effect of exercise intensity on 24-h energy expenditure and nutrient oxidation. *J Appl Physiol* 92: 1045–1052.
49. Orii KE, Aoyama T, Souri M, Jiang LL, Orii KO, et al. (1996) Formation of the enzyme complex in mitochondria is required for function of trifunctional beta-oxidation protein. *Biochem Biophys Res Commun* 219: 773–777.
50. Djouadi F, Weinheimer CJ, Saffitz JE, Pitchford C, Bastin J, et al. (1998) A gender-related defect in lipid metabolism and glucose homeostasis in peroxisome proliferator-activated receptor alpha-deficient mice. *J Clin Invest* 102: 1083–1091.
51. Gauthier JM, Theriault R, Theriault G, Gelinat Y, Simoneau JA (1992) Electrical stimulation-induced changes in skeletal muscle enzymes of men and women. *Med Sci Sports Exerc* 24: 1252–1256.
52. Rudel LL, Lee RG, Cockman TL (2001) Acyl coenzyme A: cholesterol acyltransferase types 1 and 2: structure and function in atherosclerosis. *Curr Opin Lipidol* 12: 121–127.
53. Joyce C, Skinner K, Anderson RA, Rudel LL (1999) Acyl-coenzyme A:cholesterol acyltransferase 2. *Curr Opin Lipidol* 10: 89–95.
54. Chang TY, Chang CC, Cheng D (1997) Acyl-coenzyme A:cholesterol acyltransferase. *Annu Rev Biochem* 66: 613–638.
55. Chang CC, Sakashita N, Ornvold K, Lee O, Chang ET, et al. (2000) Immunological quantitation and localization of ACAT-1 and ACAT-2 in human liver and small intestine. *J Biol Chem* 275: 28083–28092.
56. Sakashita N, Miyazaki A, Takeya M, Horiuchi S, Chang CC, et al. (2000) Localization of human acyl-coenzyme A: cholesterol acyltransferase-1 (ACAT-1) in macrophages and in various tissues. *Am J Pathol* 156: 227–236.
57. Fano G, Mecocci P, Vecchiet J, Belia S, Fulle S, et al. (2001) Age and sex influence on oxidative damage and functional status in human skeletal muscle. *J Muscle Res Cell Motil* 22: 345–351.
58. Barreiro E, Coronell C, Lavina B, Ramirez-Sarmiento A, Orozco-Levi M, et al. (2006) Aging, sex differences, and oxidative stress in human respiratory and limb muscles. *Free Radic Biol Med* 41: 797–809.
59. Enerback S, Jacobsson A, Simpson EM, Guerra C, Yamashita H, et al. (1997) Mice lacking mitochondrial uncoupling protein are cold-sensitive but not obese. *Nature* 387: 90–94.
60. Buemann B, Schiering B, Toubro S, Bibby BM, Sorensen T, et al. (2001) The association between the val/ala-55 polymorphism of the uncoupling protein 2 gene and exercise efficiency. *Int J Obes Relat Metab Disord* 25: 467–471.
61. Barbe P, Millet L, Larrouy D, Galitzky J, Berlan M, et al. (1998) Uncoupling protein-2 messenger ribonucleic acid expression during very-low-calorie diet in obese premenopausal women. *J Clin Endocrinol Metab* 83: 2450–2453.
62. Skulachev VP (1998) Uncoupling: new approaches to an old problem of bioenergetics. *Biochim Biophys Acta* 1363: 100–124.
63. Negre-Salvayre A, Hirtz C, Carrera G, Cazenave R, Troly M, et al. (1997) A role for uncoupling protein-2 as a regulator of mitochondrial hydrogen peroxide generation. *Faseb J* 11: 809–815.
64. Arsenijevic D, Onuma H, Pecqueur C, Raimbault S, Manning BS, et al. (2000) Disruption of the uncoupling protein-2 gene in mice reveals a role in immunity and reactive oxygen species production. *Nat Genet* 26: 435–439.
65. Schrauwen P, Hesselink M (2002) UCP2 and UCP3 in muscle controlling body metabolism. *J Exp Biol* 205: 2275–2285.
66. Zhang CY, Baffy G, Perret P, Krauss S, Peroni O, et al. (2001) Uncoupling protein-2 negatively regulates insulin secretion and is a major link between obesity, beta cell dysfunction, and type 2 diabetes. *Cell* 105: 745–755.
67. Vina J, Sastre J, Pallardo F, Borras C (2003) Mitochondrial theory of aging: importance to explain why females live longer than males. *Antioxid Redox Signal* 5: 549–556.
68. Vasilou V, Pappa A, Petersen DR (2000) Role of aldehyde dehydrogenases in endogenous and xenobiotic metabolism. *Chem Biol Interact* 129: 1–19.
69. Gagnon I, Duester G, Bhat PV (2002) Kinetic analysis of mouse retinal dehydrogenase type-2 (RALDH2) for retinal substrates. *Biochim Biophys Acta* 1596: 156–162.
70. Vasilou V, Pappa A, Estey T (2004) Role of human aldehyde dehydrogenases in endobiotic and xenobiotic metabolism. *Drug Metab Rev* 36: 279–299.
71. Collard F, Vertommen D, Fortpied J, Duester G, Van Schaftingen E (2007) Identification of 3-deoxyglucosone dehydrogenase as aldehyde dehydrogenase 1A1 (retinaldehyde dehydrogenase 1). *Biochimie* 89: 369–373.
72. Maly IP, Crotet V, Sasse D (1999) Spatial distribution of human liver aldehyde dehydrogenase isoenzymes. *Histochem Cell Biol* 111: 461–466.
73. Yin SJ, Liao CS, Lee YC, Wu CW, Jao SW (1994) Genetic polymorphism and activities of human colon alcohol and aldehyde dehydrogenases: no gender and age differences. *Alcohol Clin Exp Res* 18: 1256–1260.
74. Porter MM, Stuart S, Boij M, Lexell J (2002) Capillary supply of the tibialis anterior muscle in young, healthy, and moderately active men and women. *J Appl Physiol* 92: 1451–1457.
75. Duscha BD, Annex BH, Keteyian SJ, Green HJ, Sullivan MJ, et al. (2001) Differences in skeletal muscle between men and women with chronic heart failure. *J Appl Physiol* 90: 280–286.
76. Holloway GP, Perry CG, Thrush AB, Heigenhauser GJ, Dyck DJ, et al. (2008) PGC-1alpha's relationship with skeletal muscle palmitate oxidation is not present with obesity despite maintained PGC-1alpha and PGC-1beta protein. *Am J Physiol Endocrinol Metab* 294: E1060–E1069.
77. Staron RS (1997) Human skeletal muscle fiber types: delineation, development, and distribution. *Can J Appl Physiol* 22: 307–327.
78. Wang YX, Zhang CL, Yu RT, Cho HK, Nelson MC, et al. (2004) Regulation of muscle fiber type and running endurance by PPARdelta. *PLoS Biol* 2: e294.
79. Grimaldi PA (2003) Roles of PPARdelta in the control of muscle development and metabolism. *Biochem Soc Trans* 31: 1130–1132.
80. Luquet S, Lopez-Soriano J, Holst D, Fredenrich A, Melki J, et al. (2003) Peroxisome proliferator-activated receptor delta controls muscle development and oxidative capability. *Faseb J* 17: 2299–2301.
81. Lin J, Wu H, Tarr PT, Zhang CY, Wu Z, et al. (2002) Transcriptional coactivator PGC-1 alpha drives the formation of slow-twitch muscle fibres. *Nature* 418: 797–801.
82. Norrbom J, Sundberg CJ, Ameln H, Kraus WE, Jansson E, et al. (2004) PGC-1alpha mRNA expression is influenced by metabolic perturbation in exercising human skeletal muscle. *J Appl Physiol* 96: 189–194.
83. Pilegaard H, Saltin B, Neuffer PD (2003) Exercise induces transient transcriptional activation of the PGC-1alpha gene in human skeletal muscle. *J Physiol* 546: 851–858.
84. Russell AP, Feilchenfeldt J, Schreiber S, Praz M, Crettenand A, et al. (2003) Endurance training in humans leads to fiber type-specific increases in levels of peroxisome proliferator-activated receptor-gamma coactivator-1 and peroxisome proliferator-activated receptor-alpha in skeletal muscle. *Diabetes* 52: 2874–2881.
85. Gonzalez-Cadavid NF, Taylor WE, Yarasheski K, Sinha-Hikim I, Ma K, et al. (1998) Organization of the human myostatin gene and expression in healthy men and HIV-infected men with muscle wasting. *Proc Natl Acad Sci U S A* 95: 14938–14943.
86. Grobet L, Pirotin D, Farnir F, Poncet D, Royo LJ, et al. (2003) Modulating skeletal muscle mass by postnatal, muscle-specific inactivation of the myostatin gene. *Genesis* 35: 227–238.
87. Lee SJ (2004) Regulation of muscle mass by myostatin. *Annu Rev Cell Dev Biol* 20: 61–86.
88. Nagy TR, Goran MI, Weinsier RL, Toth MJ, Schutz Y, et al. (1996) Determinants of basal fat oxidation in healthy Caucasians. *J Appl Physiol* 80: 1743–1748.
89. Tarnopolsky MA, Atkinson SA, Phillips SM, MacDougall JD (1995) Carbohydrate loading and metabolism during exercise in men and women. *J Appl Physiol* 78: 1360–1368.
90. Tarnopolsky MA, Bosman M, Macdonald JR, Vandeputte D, Martin J, et al. (1997) Postexercise protein-carbohydrate and carbohydrate supplements increase muscle glycogen in men and women. *J Appl Physiol* 83: 1877–1883.
