# Supplementary material for: Sex Differences in Global mRNA Content of Human Skeletal Muscle
Source: PLoS One. 2009 Jul 22;4(7):e6335. doi: 10.1371/journal.pone.0006335 (PMC2709437; doi:10.1371/journal.pone.0006335)
Supplement: Table S1 — Affymetrix gene array analysis comparing resting human skeletal muscle of women with men. Original Affymetrix data. LogFC; Log fold-change, NLogP;negative log of the p value (>4.0), F; Woman M; Man. (0.04 MB XLS) [file pone.0006335.s001.xls]

## Sheet: Sheet1
Supplementary Table 1. Affymetrix gene array analysis comparing resting human skeletal muscle of women with men.
AffyID	Comparison	FoldChange	LogFC	Nlogp	Acronym	NetAffx Title
224588_at	F_vs_M	532.28	9.05604	55	XIST	X (inactive)-specific transcript
224590_at	F_vs_M	192.066	7.58546	28.4	XIST	X (inactive)-specific transcript
227671_at	F_vs_M	72.2187	6.1743	34.5		MRNA; cDNA DKFZp686K10163 (from clone DKFZp686K10163)
214218_s_at	F_vs_M	42.4783	5.40866	17.3	XIST	X (inactive)-specific transcript
224589_at	F_vs_M	36.4037	5.18601	29.8	XIST	X (inactive)-specific transcript
221728_x_at	F_vs_M	12.6969	3.66641	31.6	XIST	X (inactive)-specific transcript
229764_at	F_vs_M	5.94418	2.57148	8.8	FLJ41238	FLJ41238 protein
210999_s_at	F_vs_M	3.76239	1.91165	7.5	GRB10	growth factor receptor-bound protein 10
225105_at	F_vs_M	3.04451	1.60621	5.3		hypothetical protein
225081_s_at	F_vs_M	2.45213	1.29404	4.4	RAM2	transcription factor RAM2
209410_s_at	F_vs_M	2.40637	1.26686	6.4	GRB10	growth factor receptor-bound protein 10
232245_at	F_vs_M	2.36935	1.24449	4		hypothetical protein LOC284723
1558385_at	F_vs_M	2.33137	1.22118	5.8		MRNA; cDNA DKFZp667O1523 (from clone DKFZp667O1523)
215248_at	F_vs_M	2.31211	1.20921	7	GRB10	growth factor receptor-bound protein 10
207076_s_at	F_vs_M	2.18726	1.12913	6.6	ASS	argininosuccinate synthetase
209409_at	F_vs_M	2.16556	1.11474	7.8	GRB10	growth factor receptor-bound protein 10
1559977_a_at	F_vs_M	2.13874	1.09676	4.2		hypothetical protein LOC284723
203991_s_at	F_vs_M	2.13215	1.09231	6.5	UTX	ubiquitously transcribed tetratricopeptide repeat, X chromosome
203992_s_at	F_vs_M	2.00557	1.00401	12.2	UTX	ubiquitously transcribed tetratricopeptide repeat, X chromosome
235981_at	F_vs_M	2.00315	1.00227	4.2		MRNA similar to RIKEN cDNA 2700038C09 gene (cDNA clone MGC:24600 IMAGE:4245342), complete cds
213241_at	F_vs_M	1.94249	0.957909	4.7	PLXNC1	plexin C1
240890_at	F_vs_M	1.90228	0.927733	4.5		MRNA; cDNA DKFZp667O0320 (from clone DKFZp667O0320)
203548_s_at	F_vs_M	1.85278	0.889691	4.3	LPL	lipoprotein lipase
225579_at	F_vs_M	1.76546	0.820044	4.3	C2ORF22	chromosome 2 open reading frame 22
205609_at	F_vs_M	1.73965	0.7988	4.3	ANGPT1	angiopoietin 1
216894_x_at	F_vs_M	1.70671	0.771217	4.6	CDKN1C	cyclin-dependent kinase inhibitor 1C (p57, Kip2)
221868_at	F_vs_M	1.70538	0.770093	5.1	KIAA1155	KIAA1155 protein
201432_at	F_vs_M	1.70373	0.768693	6.6	CAT	catalase
203221_at	F_vs_M	1.69991	0.765459	4	TLE1	transducin-like enhancer of split 1 (E(sp1) homolog, Drosophila)
203414_at	F_vs_M	1.66721	0.737438	4.1	MMD	monocyte to macrophage differentiation-associated
211922_s_at	F_vs_M	1.62038	0.696336	4.2	CAT	catalase
213375_s_at	F_vs_M	1.6145	0.691087	6.6	CG018	hypothetical gene CG018
202003_s_at	F_vs_M	1.60929	0.686426	5.2	ACAA2	acetyl-Coenzyme A acyltransferase 2 (mitochondrial 3-oxoacyl-Coenzyme A thiolase)
228766_at	F_vs_M	1.56632	0.647379	4.4	CD36	CD36 antigen (collagen type I receptor, thrombospondin receptor)
218017_s_at	F_vs_M	1.53151	0.614952	5.3	FLJ32731	hypothetical protein FLJ32731
213348_at	F_vs_M	1.50582	0.590549	5.2	CDKN1C	cyclin-dependent kinase inhibitor 1C (p57, Kip2)
208998_at	F_vs_M	1.50464	0.589419	4.2	UCP2	uncoupling protein 2 (mitochondrial, proton carrier)
201368_at	F_vs_M	1.47566	0.56136	4.8	ZFP36L2	zinc finger protein 36, C3H type-like 2
201425_at	F_vs_M	1.46439	0.550295	4.7	ALDH2	aldehyde dehydrogenase 2 family (mitochondrial)
224936_at	F_vs_M	1.4588	0.544783	7.2	EIF2S3	eukaryotic translation initiation factor 2, subunit 3 gamma, 52kDa
224935_at	F_vs_M	1.44823	0.534293	6.1	EIF2S3	eukaryotic translation initiation factor 2, subunit 3 gamma, 52kDa
201018_at	F_vs_M	1.44271	0.528786	9.1	EIF1A	eukaryotic translation initiation factor 1A, X-linked
201016_at	F_vs_M	1.3776	0.462156	6.6	EIF1A	eukaryotic translation initiation factor 1A, X-linked
201019_s_at	F_vs_M	1.35668	0.440077	7.3	EIF1A	eukaryotic translation initiation factor 1A, X-linked
228347_at	F_vs_M	1.33986	0.422083	4	SIX1	sine oculis homeobox homolog 1 (Drosophila)
208704_x_at	F_vs_M	1.32494	0.405927	5.6	APLP2	amyloid beta (A4) precursor-like protein 2
202973_x_at	F_vs_M	1.32293	0.403738	4.2	FAM13A1	family with sequence similarity 13, member A1
201007_at	F_vs_M	1.31878	0.399199	4	HADHB	hydroxyacyl-Coenzyme A dehydrogenase/3-ketoacyl-Coenzyme A thiolase/enoyl-Coenzyme A hydratase (trifunctional protein), beta subunit /// hydroxyacyl-Coenzyme A dehydrogenase/3-ketoacyl-Coenzyme A thiolase/enoyl-Coenzyme A hydratase (trifunctional protein), beta subunit
212169_at	F_vs_M	1.3163	0.396489	4	FKBP9	FK506 binding protein 9, 63 kDa
227750_at	F_vs_M	1.30837	0.387769	4	TRAD	serine/threonine kinase with Dbl- and pleckstrin homology domains
203097_s_at	F_vs_M	1.20657	0.270908	4	RAPGEF2	Rap guanine nucleotide exchange factor (GEF) 2
204093_at	F_vs_M	-1.21412	-0.279907	4.8	CCNH	cyclin H
217883_at	F_vs_M	-1.23462	-0.304063	4		chromosome 2 open reading frame 25
201522_x_at	F_vs_M	-1.30399	-0.382933	4.4	SNRPN	small nuclear ribonucleoprotein polypeptide N
208968_s_at	F_vs_M	-1.31027	-0.389859	4.9		hypothetical protein LOC57019
212749_s_at	F_vs_M	-1.31187	-0.391629	5.1	RCHY1	ring finger and CHY zinc finger domain containing 1
218263_s_at	F_vs_M	-1.31239	-0.392198	4.3		transposon-derived Buster1 transposase-like protein
221656_s_at	F_vs_M	-1.31468	-0.394707	4.1	FLJ10521	hypothetical protein FLJ10521
1555824_a_at	F_vs_M	-1.33916	-0.421328	5.2		Nbla 3076 mRNA, complete cds.
207121_s_at	F_vs_M	-1.34113	-0.423449	4	MAPK6	mitogen-activated protein kinase 6
224801_at	F_vs_M	-1.34424	-0.426786	4.6	NDFIP2	Nedd4 family interacting protein 2
202138_x_at	F_vs_M	-1.3658	-0.449749	6.4	JTV1	JTV1 gene
224802_at	F_vs_M	-1.39793	-0.483292	4.3	NDFIP2	Nedd4 family interacting protein 2
209971_x_at	F_vs_M	-1.41942	-0.505305	5.8	JTV1	JTV1 gene
227256_at	F_vs_M	-1.42407	-0.510019	4.1	USP31	ubiquitin specific protease 31
230384_at	F_vs_M	-1.44032	-0.526387	4		Transcribed sequence with strong similarity to protein ref:NP_064569.1 (H.sapiens) ancient conserved domain protein 4 [Homo sapiens]
212350_at	F_vs_M	-1.45368	-0.539711	4.4	TBC1D1	TBC1 (tre-2/USP6, BUB2, cdc16) domain family, member 1
202749_at	F_vs_M	-1.46632	-0.552195	6	WRB	tryptophan rich basic protein
226587_at	F_vs_M	-1.47459	-0.560313	4.5		Clone IMAGE:5288750, mRNA
224728_at	F_vs_M	-1.48709	-0.572489	4	ATPAF1	ATP synthase mitochondrial F1 complex assembly factor 1
215918_s_at	F_vs_M	-1.52129	-0.605291	5.3	SPTBN1	spectrin, beta, non-erythrocytic 1
212638_s_at	F_vs_M	-1.52262	-0.606556	7.4	WWP1	WW domain-containing protein 1
224276_at	F_vs_M	-1.56612	-0.647196	4	ZNF33A	zinc finger protein 33a (KOX 31)
202599_s_at	F_vs_M	-1.59301	-0.671757	4.6	NRIP1	nuclear receptor interacting protein 1
206042_x_at	F_vs_M	-1.59914	-0.677301	5.9	SNRPN	small nuclear ribonucleoprotein polypeptide N
221974_at	F_vs_M	-1.60626	-0.683709	5		MRNA; cDNA DKFZp686M12165 (from clone DKFZp686M12165)
238054_at	F_vs_M	-1.6136	-0.690284	4.7	ADPRHL1	ADP-ribosylhydrolase like 1
228370_at	F_vs_M	-1.65028	-0.722707	6.2	SNRPN	small nuclear ribonucleoprotein polypeptide N
203498_at	F_vs_M	-1.67069	-0.740446	5.9	DSCR1L1	Down syndrome critical region gene 1-like 1
212793_at	F_vs_M	-1.70654	-0.77107	4.2	DAAM2	dishevelled associated activator of morphogenesis 2
201690_s_at	F_vs_M	-1.72039	-0.782736	5.7	TPD52	tumor protein D52
212446_s_at	F_vs_M	-1.81936	-0.863428	4.1		LAG1 longevity assurance homolog 6 (S. cerevisiae)
213744_at	F_vs_M	-1.82988	-0.87175	4.8	ATRNL1	attractin-like 1
212224_at	F_vs_M	-1.87892	-0.909904	6	ALDH1A1	aldehyde dehydrogenase 1 family, member A1
236694_at	F_vs_M	-2.00633	-1.00456	5.1	CYORF15A	chromosome Y open reading frame 15A
209611_s_at	F_vs_M	-2.19623	-1.13503	4.8	SLC1A4	solute carrier family 1 (glutamate/neutral amino acid transporter), member 4
1570360_s_at	F_vs_M	-2.61667	-1.38773	6.2	DDX3Y	DEAD (Asp-Glu-Ala-Asp) box polypeptide 3, Y-linked
216379_x_at	F_vs_M	-3.51298	-1.8127	10
209771_x_at	F_vs_M	-4.18924	-2.06669	7	CD24	CD24 antigen (small cell lung carcinoma cluster 4 antigen)
223646_s_at	F_vs_M	-5.48675	-2.45595	7.7	CYORF15B	chromosome Y open reading frame 15B
228492_at	F_vs_M	-7.5207	-2.91087	12.1	USP9Y	ubiquitin specific protease 9, Y-linked (fat facets-like, Drosophila)
229638_at	F_vs_M	-10.9174	-3.44856	11.4	IRX3	iroquois homeobox protein 3
205001_s_at	F_vs_M	-13.0041	-3.70089	20.4	DDX3X	DEAD (Asp-Glu-Ala-Asp) box polypeptide 3, X-linked
206624_at	F_vs_M	-13.78	-3.7845	12.6	USP9Y	ubiquitin specific protease 9, Y-linked (fat facets-like, Drosophila)
205000_at	F_vs_M	-14.4631	-3.85431	14.6	DDX3Y	DEAD (Asp-Glu-Ala-Asp) box polypeptide 3, Y-linked
230760_at	F_vs_M	-18.3509	-4.19778	18.1	ZFY	zinc finger protein, Y-linked
206700_s_at	F_vs_M	-19.5587	-4.28974	18.9	JARID1D	Jumonji, AT rich interactive domain 1D (RBP2-like)
204410_at	F_vs_M	-27.44	-4.77821	13.5	EIF1AY	eukaryotic translation initiation factor 1A, Y-linked
201909_at	F_vs_M	-49.0432	-5.61598	25	RPS4Y	ribosomal protein S4, Y-linked 1
204409_s_at	F_vs_M	-112.084	-6.80844	24.6	EIF1AY	eukaryotic translation initiation factor 1A, Y-linked
